# Supplementary material for: A Method for Multimodal IVA Fusion Within a MISA Unified Model Reveals Markers of Age, Sex, Cognition, and Schizophrenia in Large Neuroimaging Studies
Source: PubMed Central journal article supplement — Hum Brain Mapp. 2024 Nov 19;45(17):e70037. doi: 10.1002/hbm.70037 (PMC11574741; doi:10.1002/hbm.70037), 2024-11-19
Supplement: HBM-45-e70037-s001.pdf [file HBM-45-e70037-s001.pdf]

## 895 S1. Supporting Information

896 This document contains Supporting Information for “*Direct linkage detection with multimodal IVA*  
897 *fusion reveals markers of age, sex, cognition, and schizophrenia in large neuroimaging studies,*” by  
898 Rogers F. Silva, Eswar Damaraju, Xinhui Li, Peter Kochunov, Judith M. Ford, Daniel H. Mathalon,  
899 Jessica A. Turner, Theo G.M. van Erp, Tulay Adali, and Vince D. Calhoun.

### 900 S1.1. Image Acquisition Parameters

901 *UK Biobank*: **sMRI** T1-weighted structural MRI images were acquired using a 3D MPRAGE  
902 sequence at  $1\text{mm}^3$  isotropic sagittal slices with acquisition parameters:  $208 \times 256 \times 256$  matrix,  
903  $R=2$ ,  $TI/TR=880/2000$  ms. **rs-fMRI** Resting functional MRI were acquired axially at  $2.4\text{mm}^3$   
904 resolution while the subjects fixated at a cross with the following acquisition parameters:  $88 \times 88 \times 64$   
905 matrix,  $TE/TR=39/735\text{ms}$ ,  $MB=8$ ,  $R=1$ , flip angle  $52^\circ$ . A pair of spin echo scans of opposite  
906 phase encoding direction in the same imaging resolution as rs-fMRI scans were acquired to estimate  
907 and correct distortions in rs-fMRI echo-planar images, and a single-band high resolution reference  
908 image was acquired at the start of the rs-fMRI scan to ensure good realignment and normalization.  
909 **dMRI** Diffusion MRI images were acquired using a standard Stejskal-Tanner spin-echo sequence at  
910  $2\text{mm}^3$  isotropic resolution at three different b values ( $b = 0, 1000$  and  $2000$   $\text{s}/\text{mm}^2$ ) and 50 distinct  
911 diffusion-encoding directions, each using a multi-band (MB) factor of 3.

912 *COBRE*: The COBRE dataset was collected using a 3-Tesla Siemens Tim Trio scanner (Qi et al.,  
913 2022). **sMRI** A high-resolution T1-weighted multi-echo MPRAGE (MEMPR) sequence was used with  
914 the following parameters (INDI, 2022):  $TR/TE/TI = 2530/[1.64, 3.5, 5.36, 7.22, 9.08]/900$  ms, flip  
915 angle =  $7^\circ$ , matrix =  $256 \times 256 \times 176$ , voxel size =  $1 \times 1 \times 1$   $\text{mm}^3$ , number of echos = 5, pixel bandwidth  
916 = 650 Hz, total scan time = 6 min. With 5 echoes, the TR, TI and time to encode partitions for  
917 the MEMPR are similar to that of a conventional MPRAGE, resulting in similar GM/WM/CSF  
918 contrast. MPRAGE: collected in the Sag plane - series interleaved - multi slice mode - single shot.  
919 **rs-fMRI** Rest data was collected with a standard single-shot, full k-space echo-planar imaging (EPI)  
920 sequence with ramp sampling correction, using the intercomissural line (AC-PC) as a reference and  
921 repetition time (TR)/echo time (TE) =  $2,000/29$  ms, voxel size =  $3.75 \times 3.75 \times 4.55$   $\text{mm}^3$ , slice gap =  
922 1.05 mm, 32 slices, flip angle =  $75^\circ$ , field of view (FOV) =  $240 \times 240$   $\text{mm}^2$ , matrix size =  $64 \times 64$ , and  
923 a total of 149 volumes. Slice Acquisition Order: collected in the Axial plane - series ascending - multi  
924 slice mode - interleaved. **dMRI** Diffusion data were acquired via a single-shot spin-echo echo planar  
925 imaging (EPI) with a twice-refocused balanced echo sequence to reduce eddy current distortions.  
926 The dMRI sequence included 30 directions,  $b = 800$   $\text{s}/\text{mm}^2$  and five measurements of  $b = 0$ , for

927 6 minutes of acquisition time. The  $b = 0$  measurements were interleaved after every six non-zero  
928  $b$ -value measurements. The images were obtained in the axial direction along the AC-PC line. The  
929 FOV was  $256 \times 256 \text{ mm}^2$ , 72 slices,  $128 \times 128$  matrix, voxel size =  $2 \times 2 \times 2 \text{ mm}^3$ , TE = 84 ms, TR =  
930 9000 ms, number of excitations (NEX) = 1, partial Fourier encoding of 3/4, and with a GRAPPA  
931 acceleration factor of 2 (Wu et al., 2015).

932 *FBIRN*: The fBIRN phase III dataset was collected from seven sites. Six of the seven sites used  
933 3-Tesla Siemens Tim Trio scanners, and one site used a 3-Tesla General Electric (GE) Discovery  
934 MR750 scanner. **sMRI** A high-resolution Siemens MPRAGE sequence was acquired with the following  
935 parameters: TR/TE/TI = 2300/2.94/1100 ms, flip angle =  $9^\circ$ , matrix =  $256 \times 256 \times 160$ . Likewise, a  
936 GE IR-SPGR sequence was acquired with the following parameters: TR/TE/TI = 5.95/1.99/45 ms,  
937 flip angle =  $12^\circ$ , matrix =  $256 \times 256 \times 166$ . All scans covered the entire brain with FOV =  $220 \text{ mm}^2$ ,  
938 voxel size =  $0.86 \times 0.86 \times 1.2 \text{ mm}^3$ , collected in the sagittal plane with GRAPPA/ASSET acceleration  
939 factor = 2, and NEX = 1 (Qi et al., 2022). **rs-fMRI** The same rs-fMRI parameters were used across  
940 all sites (Qi et al., 2022): a standard gradient EPI sequence, TR/TE = 2,000/30 ms, voxel size =  
941  $3.4375 \times 3.4375 \times 4 \text{ mm}^3$ , slice gap = 1 mm, flip angle =  $77^\circ$ , FOV =  $220 \times 220 \text{ mm}^2$ , and a total of 162  
942 volumes. **dMRI** All acquisition parameters for all scanners were the same except for TE (Siemens  
943 84ms/GE 81.7ms). The rest were as follows (Qi et al., 2018b): TR = 9000ms; matrix =  $128 \times 128$ ;  
944 FOV =  $256 \times 256 \text{ mm}^2$ ; number of slices = 72; slice gap = 2 mm; voxel size  $2 \times 2 \times 2 \text{ mm}^3$ ; flip angle =  
945  $90^\circ$ ; number of diffusion gradient directions = 30,  $b = 800 \text{ s/mm}^2$ , 5 measurements with  $b = 0$ , NEX  
946 = 1. All images were registered to the first  $b = 0$  image by [FMRIB Linear Image Registration Tool](#)  
947 (FLIRT).

948 *MPRC*: The MPRC dataset was collected in 3 sites, each with a different 3-Tesla Siemens  
949 scanner, using a standard EPI sequence. **sMRI** T1-weighted 3D MPRAGE collected in the sagittal  
950 plane,  $1 \times 1 \times 1 \text{ mm}^3$ . Siemens Allegra: TE/TR/TI=4.3/2500/1000ms, flip angle= $8^\circ$ . Siemens Trio:  
951 TE/TR/TI=2.9/2300/900ms, flip angle= $9^\circ$  (Schijven et al., 2023). **rs-fMRI** Siemens 3-Tesla Siemens  
952 Allegra scanner (TR/TE = 2,000/27 ms, voxel size =  $3.44 \times 3.44 \times 4 \text{ mm}^3$ , FOV =  $220 \times 220 \text{ mm}^2$ ,  
953 and 150 volumes); 3-Tesla Siemens Trio scanner (TR/TE = 2,210/30 ms, voxel size =  $3.44 \times 3.44 \times 4$   
954  $\text{mm}^3$ , FOV =  $220 \times 220 \text{ mm}^2$ , and 140 volumes); and 3-Tesla Siemens Tim Trio scanner (TR/TE =  
955 2,000/30 ms, voxel size =  $1.72 \times 1.72 \times 4 \text{ mm}^3$ , FOV =  $220 \times 220 \text{ mm}^2$ , and 444 volumes) (Qi et al.,  
956 2022). **dMRI** All dMRI was performed using the Siemens 3T Trio scanner with a 32 channel phase  
957 array head coil. The high-angular resolution diffusion imaging (HARDI) protocol was used to assess  
958 white matter integrity as measured by fractional anisotropy (FA) (Wang et al., 2016; Wright et al.,  
959 2015). The dMRI data were collected using a single-shot, echo-planar, single refocusing spin-echo,

960 T2-weighted sequence, with GRAPPA (acceleration factor 2), yielding voxel dimensions  $1.7 \times 1.7 \times 3.0$   
 961  $\text{mm}^3$ , acquisition time approximately 8 min. The sequence parameters were:  $\text{TE}/\text{TR} = 87/8,000$  ms,  
 962  $\text{FOV} = 200$  mm, axial slice orientation with 50 slices and no gap, 5 b = 0 images and 64 isotropically  
 963 distributed diffusion-weighted directions with  $b = 700$   $\text{s}/\text{mm}^2$ . All data passed quality-assurance  
 964 control of less than 3 mm accumulated motion during the scan. (Herskovits et al., 2015)

965 *BSNIP*: Subjects were scanned at six sites (Giakoumatos et al., 2015): Boston, MA (3.0 T, GE  
 966 Signa); Detroit, MI (3.0 T, Siemens Allegra); Baltimore, MD (3.0 T, Siemens Trio Tim); Hartford,  
 967 CT (3.0 T, Siemens Allegra); Dallas, TX (3.0 T, Philips Achieva); and Chicago, IL (3.0 T, GE  
 968 Signa). This work only included data from Hartford and Baltimore sites. **sMRI** High-resolution  
 969 isotropic T1-weighted MPRAGE scans ( $\text{TR} = 6.7$  ms,  $\text{TE} = 3.1$  ms,  $8^\circ$  flip angle,  $256 \times 240$  matrix  
 970 size, total scan duration  $\approx 11$  min, 170 sagittal slices, 1 mm slice thickness,  $1 \times 1 \times 1.2$   $\text{mm}^3$  voxel  
 971 size) were acquired following the Alzheimer’s Disease Neuroimaging Initiative (ADNI) protocol  
 972 (<http://www.loni.ucla.edu/ADNI>) (Giakoumatos et al., 2015). **rs-fMRI** See Table S1 (Qi et al.,  
 973 2022). **dMRI** Hartford used 32 gradient directions with  $b=1000$   $\text{s}/\text{mm}^2$ , one baseline scan with  $b=0$   
 974  $\text{s}/\text{mm}^2$ ;  $\text{TE} = 85$ ;  $\text{TR} = 6300$  ms;  $\text{FOV} = 222$  mm; a voxel size of  $1.73 \times 1.73 \times 3$   $\text{mm}^3$ . Baltimore used  
 975 30 gradient directions with  $b=1000$   $\text{s}/\text{mm}^2$ , one baseline scan with  $b=0$   $\text{s}/\text{mm}^2$ ;  $\text{TE} = 92$  ms;  $\text{TR} =$   
 976  $6700$  ms;  $\text{FOV} = 230$  mm; a voxel size of  $1.83 \times 1.83 \times 3$   $\text{mm}^3$  (Cetin-Karayumak et al., 2020).

Table S1: **BSNIP Acquisition Parameters for rs-fMRI.**

| Site      | TR ms | TE ms | Flip angle | Slices | Voxel Size ( $\text{mm}^3$ ) | Time points |
|-----------|-------|-------|------------|--------|------------------------------|-------------|
| Baltimore | 2210  | 30    | $70^\circ$ | 36     | $3.4 \times 3.4 \times 4$    | 140         |
| Hartford  | 1500  | 27    | $70^\circ$ | 29     | $3.4 \times 3.4 \times 5$    | 210         |

977 *S1.2. UK Biobank Phenotype Variables*

978 54 UK Biobank phenotype variables were further reduced to 26 variables for MANCOVA analysis  
 979 and effect size analysis, as described below.

980 28 physical exercise variables were decomposed to 8 principal components by PCA. 2 age-related  
 981 variables (“years since first sexual intercourse” and “years since started wearing glasses”) were  
 982 dropped because they are highly correlated with other age variables. 2 variables associated with fluid  
 983 intelligence (“number of fluid intelligence questions attempted within time limit” and “interaction  
 984 between number of attempts and score”) and 4 other log variables (“time to complete round”, “log  
 985 time to answer”, “inverse log duration screen displayed”, “inverse log number of attempts”) were also  
 986 removed, resulting in 26 variables in total.

Table S2: **54 UK Biobank Phenotype Variables.**

| Variable ID | Variable Name                                                      |
|-------------|--------------------------------------------------------------------|
| f399 2 2    | number of incorrect matches in round                               |
| f400 2 2    | time to complete round                                             |
| f699 2 0    | length of time at current address                                  |
| f864 2 0    | number of daysweek walked 10 minutes                               |
| f874 2 0    | duration of walks                                                  |
| f884 2 0    | number of daysweek of moderate physical activity 10 minutes        |
| f894 2 0    | duration of moderate activity                                      |
| f904 2 0    | number of daysweek of vigorous physical activity 10 minutes        |
| f914 2 0    | duration of vigorous activity                                      |
| f943 2 0    | frequency of stair climbing in last 4 weeks                        |
| f971 2 0    | frequency of walking for pleasure in last 4 weeks                  |
| f981 2 0    | duration walking for pleasure                                      |
| f991 2 0    | frequency of strenuous sports in last 4 weeks                      |
| f1001 2 0   | duration of strenuous sports                                       |
| f1011 2 0   | frequency of light diy in last 4 weeks                             |
| f1021 2 0   | duration of light diy                                              |
| f1050 2 0   | time spend outdoors in summer                                      |
| f1060 2 0   | time spent outdoors in winter                                      |
| f1070 2 0   | time spent watching television tv                                  |
| f1080 2 0   | time spent using computer                                          |
| f1160 2 0   | sleep duration                                                     |
| f1438 2 0   | bread intake                                                       |
| f1488 2 0   | tea intake                                                         |
| f1498 2 0   | coffee intake                                                      |
| f1558 2 0   | alcohol intake frequency                                           |
| f2139 2 0   | age first had sexual intercourse                                   |
| f2217 2 0   | age started wearing glasses or contact lenses                      |
| f2624 2 0   | frequency of heavy diy in last 4 weeks                             |
| f2634 2 0   | duration of heavy diy                                              |
| f3637 2 0   | frequency of other exercises in last 4 weeks                       |
| f3647 2 0   | duration of other exercises                                        |
| f4288 2 0   | time to answer                                                     |
| f4609 2 0   | longest period of depression                                       |
| f20016 2 0  | fluid intelligence score                                           |
| f20023 2 0  | mean time to correctly identify matches                            |
| f20128 2 0  | number of fluid intelligence questions attempted within time limit |
| f21003 2 0  | age when attended assessment centre                                |
| 2 0         | total hours walked 10 minutes                                      |
| 2 0         | total hours moderate physical activity 10 minutes                  |
| 2 0         | total hours vigorous physical activity 10 minutes                  |
| 2 0         | total hours of walking for pleasure in last 4 weeks                |
| 2 0         | total hours of strenuous sports in last 4 weeks                    |
| 2 0         | total hours of other exercises in last 4 weeks                     |
| 2 0         | total hours of light diy in last 4 weeks                           |
| 2 0         | total hours of heavy diy in last 4 weeks                           |
| 2 0         | number of physical activities wrt walking for pleasure             |
| 2 0         | years since first sexual intercourse                               |
| 2 0         | years since started wearing glasses                                |
| 2 0         | log time to answer                                                 |
| 2 0         | inverse log duration screen displayed                              |
| 2 0         | inverse log number of attempts                                     |
| 2 0         | log pm score                                                       |
| 2 0         | fluid intelligence interaction                                     |
| f31 0 0     | sex                                                                |

987 The 26 variables are common to all of the modality-specific MANCOVA models. The interaction  
988 between age and sex is also included for each of the modality-specific MANCOVA models. In addition  
989 to the 27 common variables, sMRI and dMRI modalities have 1 nuisance variable (rspatialNorm:  
990 correlation between individual GM/FA map to the site-specific mean) and fMRI has 2 nuisance

991 variables (rsatialNorm, and meanFD: estimated mean framewise displacement of the subject during  
992 the scan).

993 For brain-age delta analysis, we use a different subset of 42 variables from the original 64 variables.  
994 Those variables are listed in Figures 5, S3, S4, and S5.

### 995 *S1.3. Preprocessing Details*

996 *UK Biobank: sMRI* The images underwent segmentation and normalization to MNI space  
997 using the SPM12 toolbox, yielding GM, white matter (WM), and cerebro-spinal fluid (CSF) tissue  
998 probability maps. The normalized GM segmentations were spatially smoothed using a 10mm FWHM  
999 Gaussian filter. The smoothed images were resampled to  $3\times 3\times 3\text{mm}^3$ . We defined a group mask  
1000 to restrict the analysis to GM voxels as follows. First, an average GM segmentation map from all  
1001 subjects was obtained from the normalized GM segmentation maps at  $1\text{mm}^3$  resolution. This map  
1002 was binarized at a 0.2 threshold (classify voxels with a group average probability  $> 0.2$  as gray  
1003 matter) and resampled to  $3\times 3\times 3\text{mm}^3$  resolution, which resulted in  $V_m = 44,318$  in-brain voxels.  
1004 *rs-fMRI* We used distortion corrected, FIX-denoised (Griffanti et al., 2014), normalized rs-fMRI  
1005 data provided by the UK Biobank data resource to compute subject-specific ALFF maps, defined as  
1006 the area under the low frequency band [0.01-0.08 Hz] power spectrum of each voxel time course in a  
1007 given scan. We then obtained mean-scaled ALFF maps (mALFF), which are subject-specific ALFF  
1008 maps divided by their global mean ALFF value, since this scaling has been shown to result in greater  
1009 test-retest reliability of ALFF maps (Zhao et al., 2018). The mALFF maps were smoothed using a  
1010 6mm FWHM Gaussian filter and resampled to  $3\times 3\times 3\text{mm}^3$  isotropic voxels. We used the same group  
1011 mask learned from GM features for mALFF maps in the subsequent fusion analysis. *dmRI* The FA  
1012 maps provided by the UK Biobank consortium were used. The preprocessing steps that raw dmRI  
1013 images underwent are thoroughly described in (Alfaro-Almagro et al., 2018). The FA maps were  
1014 then spatially smoothed using a 6mm FWHM Gaussian filter and resampled to  $3\times 3\times 3\text{mm}^3$  voxels.  
1015 For dmRI data, we computed a group mask similar to the approach described above for sMRI data.  
1016 However, the group average WM segmentation was binarized at a threshold of 0.4, resulting in  $V_m =$   
1017 18,684 in-brain voxels in the group mask.

1018 *Patient Datasets: sMRI* All datasets underwent the same preprocessing steps (Qi et al., 2022):  
1019 data were normalized to MNI space using the unified segmentation method in SPM12, resliced to  
1020  $3\text{mm}^3$ , and segmented into gray matter (GM), white matter (WM), and cerebral spinal fluid (CSF)  
1021 using modulated normalization, yielding results such as gray matter volume (GMV). The GMV  
1022 maps were then smoothed using a Gaussian kernel with a full width at half maximum (FWHM)

1023 = 6 mm. Subject outlier detection was further performed using a spatial Pearson correlation with  
1024 the template image to ensure that all subjects were properly segmented. **rs-fMRI** All datasets  
1025 underwent the same preprocessing (Qi et al., 2022) based on statistical parametric mapping (SPM12,  
1026 <http://www.fil.ion.ucl.ac.uk/spm/>) under a MATLAB 2019 environment. It included the following  
1027 steps: 1) the first five scans were discarded to remove T1 equilibration effects 2) slice timing correction;  
1028 3) realignment; 4) normalization to the EPI template with  $3\times 3\times 3\text{mm}^3$  resolution; 5) spatial smoothing  
1029 using a 6mm FWHM Gaussian kernel. After that, 6) nuisance covariates (6 head motions + CSF +  
1030 WM) + global signal were regressed out via a general linear model from the voxel time series, and  
1031 7) calculation of mALFF. **dmMRI COBRE and BSNIP**: The dmMRI data were processed with the  
1032 following steps (Caprihan et al., 2011). Motion and eddy current correction: Given a 4D DTI volume  
1033 and a table of corresponding b-values and gradient direction vectors, we registered all the images to a  
1034  $b=0$  s/mm<sup>3</sup> image, and a 12 degrees of freedom affine transformation with mutual information cost  
1035 function was used for image registration. Adjusting the diffusion gradient direction: Two corrections  
1036 were applied to the diffusion gradients. The nominal diffusion gradient directions were prescribed in  
1037 the magnet axis frame. We rotated them to correspond to the image slice orientation. No correction  
1038 was required if the imaging slice was pure axial. A second correction accounted for any image rotation  
1039 during the previous motion and eddy current correction step. The rotation part of the transformation  
1040 previously found was extracted, and each gradient direction vector was accordingly corrected. All the  
1041 image registration and transformations were done with FLIRT. Dtifit, a tool in FSL, was adopted to  
1042 calculate the diffusion tensor and the FA maps. The FA image was aligned to an Montreal Neurologic  
1043 Institute (MNI) FA template with FNIRT and resliced via SPM, resulting in a final voxel size of  
1044  $2\times 2\times 2$  mm<sup>3</sup>. **fBIRN**: DMRI data were preprocessed with the following steps (Qi et al., 2018b): 1)  
1045 quality check with any gradient directions with excessive motion or vibration artifacts identified  
1046 and removed; 2) motion and eddy current correction; 3) correction of gradient directions for any  
1047 image rotation done during the previous motion correction step; and 4) calculation of diffusion tensor.  
1048 **MPRC**: FA images were created by fitting the diffusion tensor voxel-wise, after correcting the data  
1049 for head motion and eddy-current distortion (Wright et al., 2015). Average head motion during  
1050 the scans was measured during spatial alignment of diffusion-sensitized images to the  $b = 0$  image.  
1051 The RMSDIFF program, distributed with FSL was used to estimate the root mean square (RMS)  
1052 movement distance between diffusion sensitized and  $b = 0$  images. All data passed a quality assurance  
1053 control of less than 3 mm accumulated motion during the scan. Then, all FA images were globally  
1054 spatially normalized to the Johns Hopkins University (JHU) atlas that is distributed with the FSL  
1055 package.

1056 The patient datasets were Gaussian smoothed, with filter FWHM = 10mm (GM), 6mm (mALFF),  
1057 6mm (FA), and resampled to  $3 \times 3 \times 3 \text{mm}^3$  resolution. The same masks defined for UK Biobank were  
1058 used in the patient datasets.

1060 Five SCVs (3, 5, 8, 16, 17) were significantly associated with age identified by the MANCOVA  
 1061 analysis.

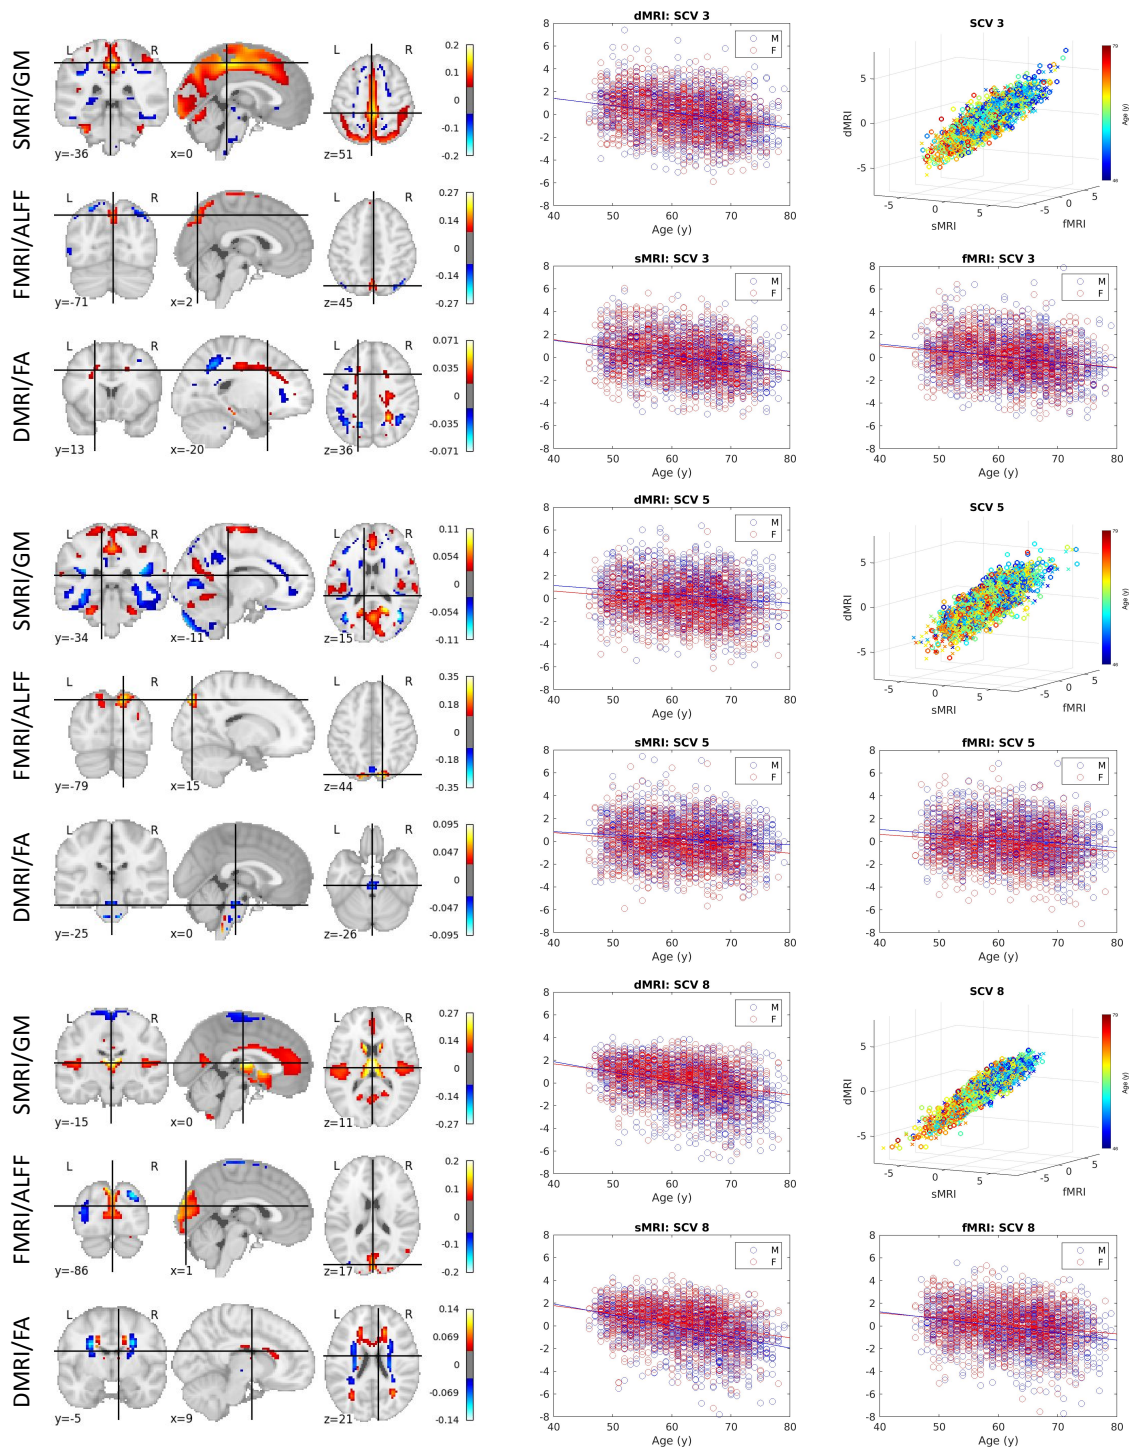

(a) SCVs 3, 5, and 8



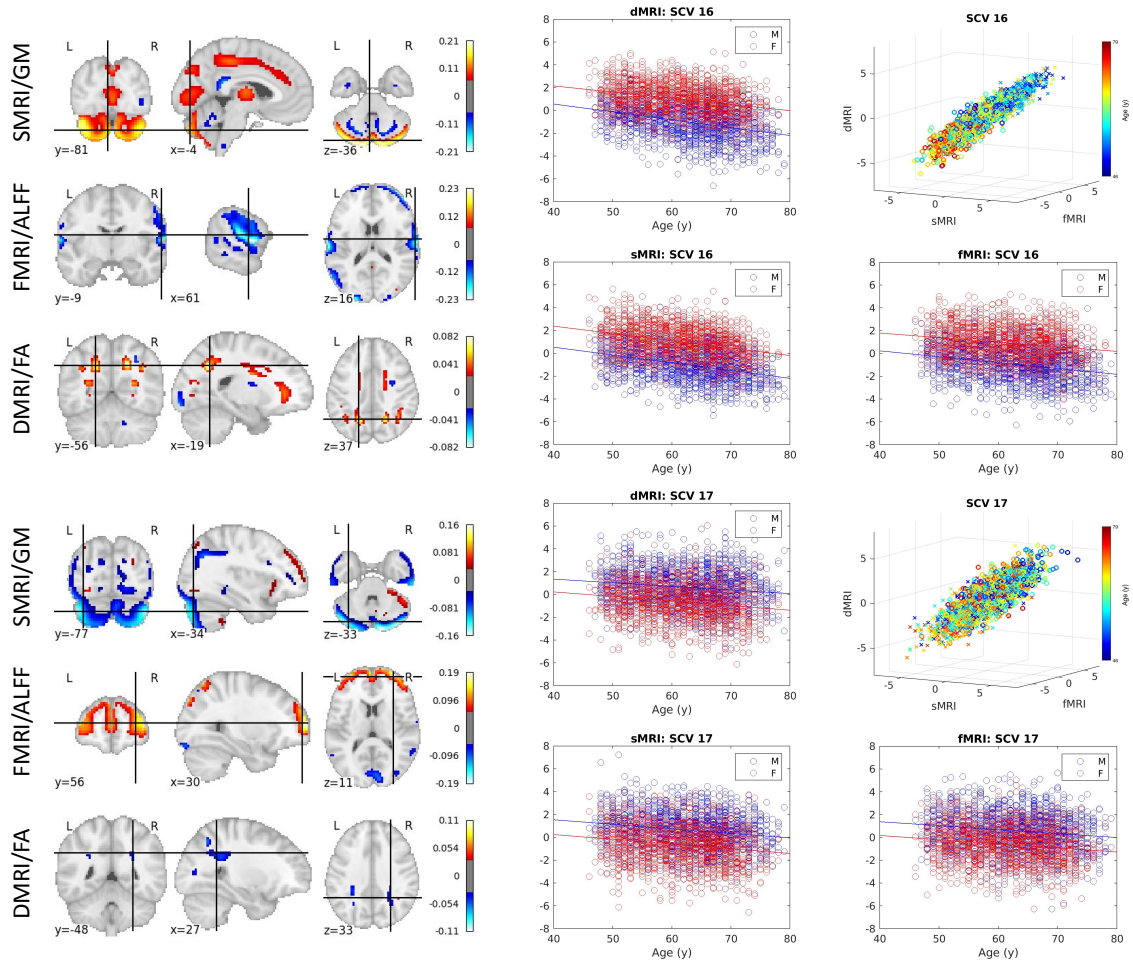

(b) SCVs 16 and 17

Figure S1: **Age-related SCV**. Right: 3D scatter plots of SCVs 3, 5, 8, 16, 17 illustrate the association between the identified multimodal subject expression levels and age for UK Biobank data. Each point represents a subject, color coded by the age (circles indicate females; crosses indicate males). Left: The spatial maps corresponding to the mixing weights for each modality are also shown.

1062 *S1.5. Brain-age Delta Modeling*

1063 *S1.5.1. Estimation Details*

1064 In the first step of brain-age delta modeling, the subject expression levels (the top SVD-shared  
 1065 feature plus the partialled sMRI and fMRI features) from five SCVs with significant age effect size  
 1066 (based on the multivariate MANCOVA assessment in Section 2.6) were used to predict age. Thus,  
 1067 the initial estimate of brain-age delta was evaluated as:

$$\delta_1 = X\beta_1 - Y, \quad (11)$$

1068 where  $Y$  is the actual age after removing the mean age across subjects,  $X$  is the matrix of significant  
 1069 age-related SCVs with size  $N \times \bar{C}$  ( $N$  = number of subjects,  $\bar{C}$  = 5 SVD-shared features + 5 sMRI  
 1070 sources + 5 dMRI sources = 15), and  $\beta_1$  is the  $\bar{C} \times 1$  vector of regression parameters. As such,  
 1071  $\delta_1$  shows the aging effects that cannot be captured by the imaging modalities, with positive values  
 1072 suggesting accelerated aging and negative values suggesting slowed down aging.

1073 In the second step of brain-age delta modeling, the model is refined to identify aspects of  $\delta_1$  that  
 1074 cannot be captured by age terms (notice that  $\delta_1$  is by definition dependent on age) nor confounds,  
 1075 such as sex. Thus,  $\delta_2$  is evaluated as:

$$\delta_2 = \delta_1 - Y_2\beta_2, \quad (12)$$

1076 where the regression matrix  $Y_2$  includes the demeaned linear age term, the demeaned quadratic age  
 1077 term after regressing out the linear age effects and normalizing to have the same standard deviation  
 1078 as the linear age term, the demeaned cubic age term after regressing out the linear and quadratic  
 1079 age effects and normalizing to have the same standard deviation as the linear age term, sex, the  
 1080 interaction between sex and each of the three age terms, the framewise displacement variable, and  
 1081 the spatial normalization variables from the three modalities. Note that after each effect removal  
 1082 step, the mean of the adjusted variable was removed again.  $\beta$  regression coefficients are estimated as  
 1083 usual by  $\beta_1 = (X^\top X)^{-1}X^\top Y$  and  $\beta_2 = (Y_2^\top Y_2)^{-1}Y_2^\top \delta_1$ .

1084 Following that, source-specific contributions to the overall brain age delta can be determined,  
 1085 yielding source-specific delta vectors,  $\delta_{1i}$  and  $\delta_{2i}$ , as follows. First, note that the source-specific  
 1086 contributions can be combined to recover the original  $Y$  (here,  $\frac{1}{\bar{C}}$  is arbitrary and irrelevant since age  
 1087 effects are removed in the following step, thus we set  $\frac{1}{\bar{C}} = 0$ ):

$$X\beta_1 - \delta_1 = \sum_{i=1}^{\bar{C}}(X_i\beta_{1i} - \delta_{1i}) = \sum_{i=1}^{\bar{C}}\frac{1}{\bar{C}}Y = Y. \quad (13)$$

1088 The source-specific delta vector at the first stage,  $\delta_{1i}$ , can be calculated by:

$$\delta_{1i} = X_i\beta_{1i} - \frac{Y}{\bar{C}}. \quad (14)$$

1089 In the next step, we compute the regression coefficients  $\beta_{2i} = (Y_2^\top Y_2)^{-1} Y_2^\top \delta_{1i}$ , and the source-  
1090 specific delta vector at the second stage is obtained:

$$\delta_{2i} = \delta_{1i} - Y_2\beta_{2i}. \quad (15)$$

1091 We removed the mean of the  $\delta_{2i}$  at the end. We repeated the above source-specific brain-age delta  
1092 estimation process (14) and (15) for each source in each age-related SCV.

1093 We then computed the final source-specific 2-stage brain-age *partialled*  $\delta_{2i}$  by regressing out other  
1094  $\delta_{2i}$  vectors from each particular  $\delta_{2i}$  vector.

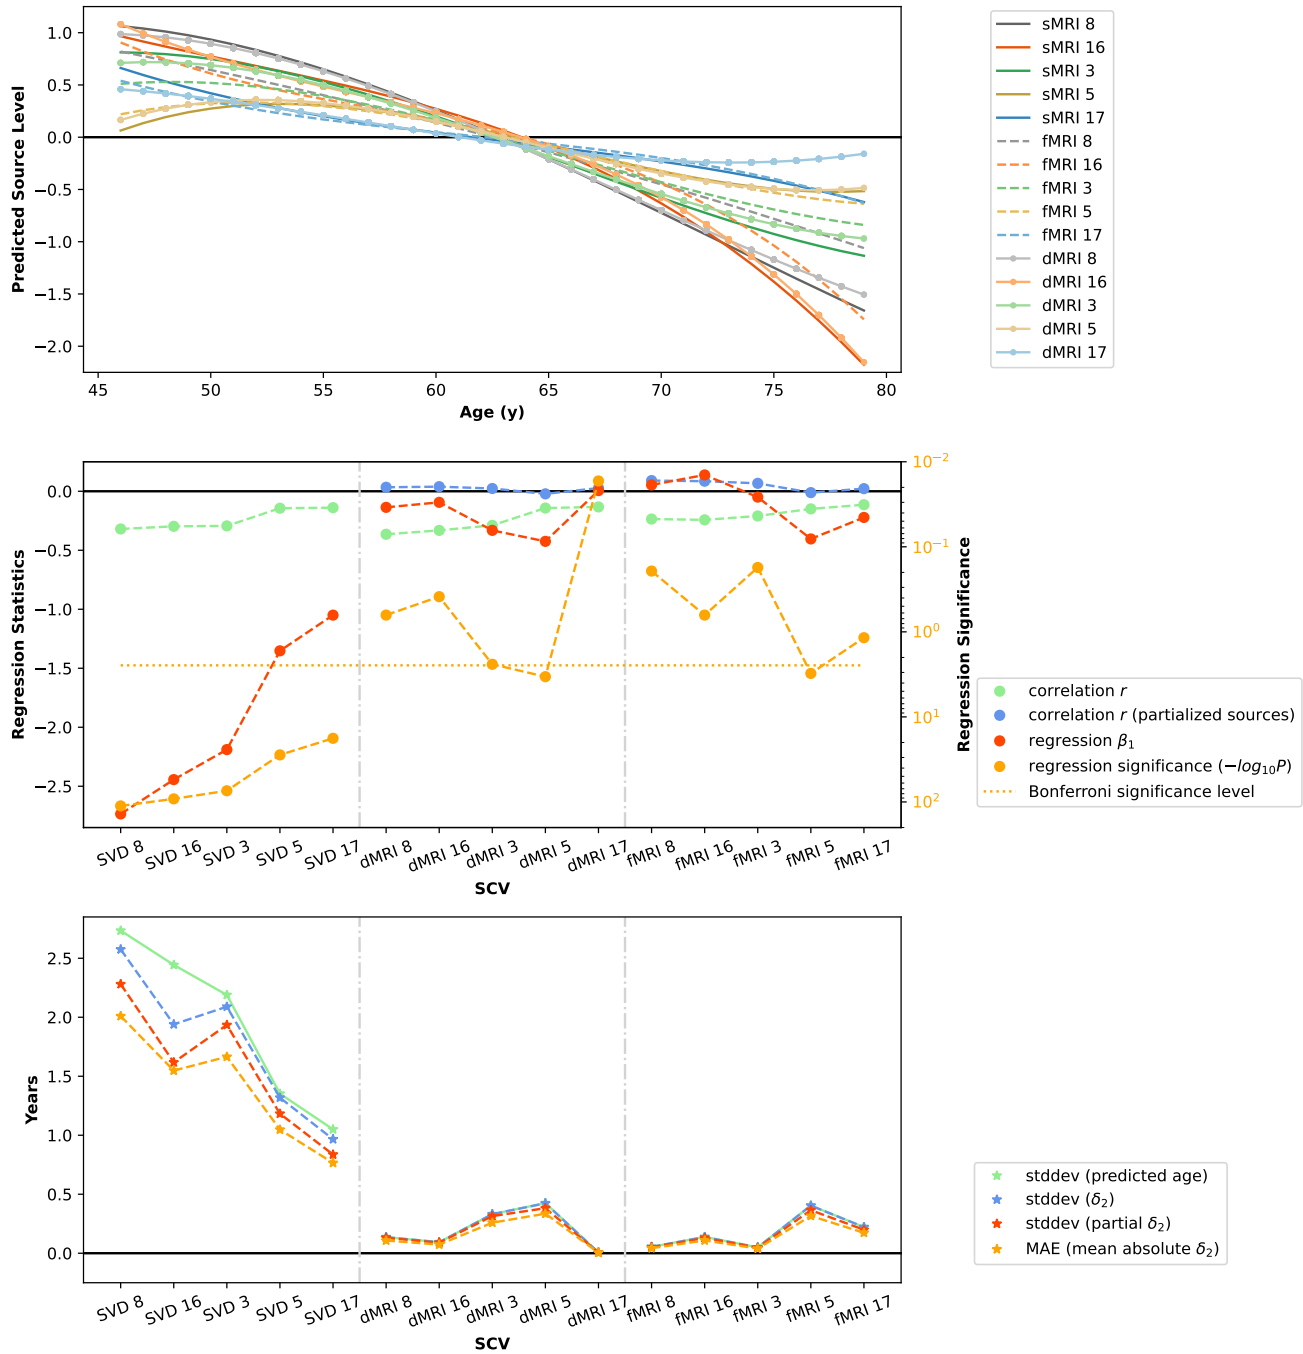

Figure S2: **Brain age delta modeling (dMRI)**. Top: Predicted source levels as a function of brain age using a cubic model. Middle: Regression statistics at stage 1 of brain-age delta modeling ( $age = S * \beta_1$ ). Bottom: Standard deviation of predicted age, standard deviation of estimated stage 2 brain-age delta, and mean absolute error in stage 2 brain-age model. SCVs are sorted according to the correlation between the age and the source within each modality.

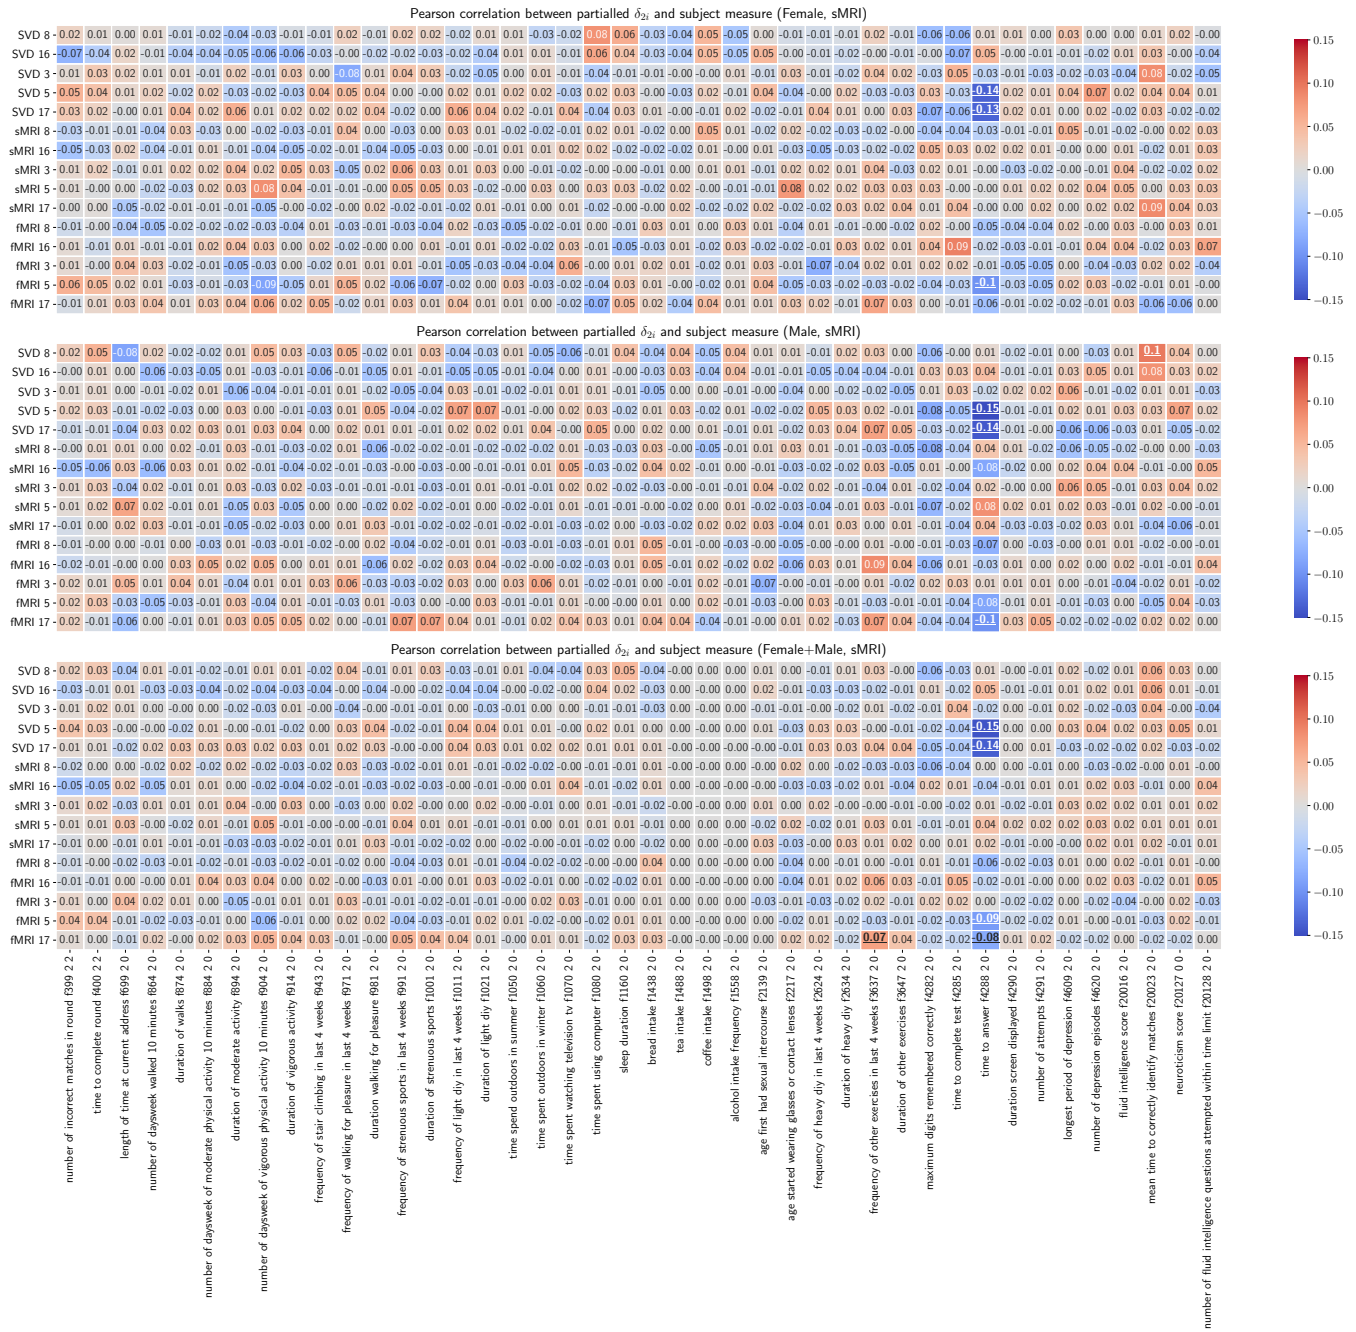

Figure S3: Pearson correlations between partialled  $\delta_{2i}$  vectors (sMRI) and subject measures. Pearson correlations are calculated between 15 partialled  $\delta_{2i}$  vectors and 42 variables for each gender and for all subjects. The underscored correlations are significant.

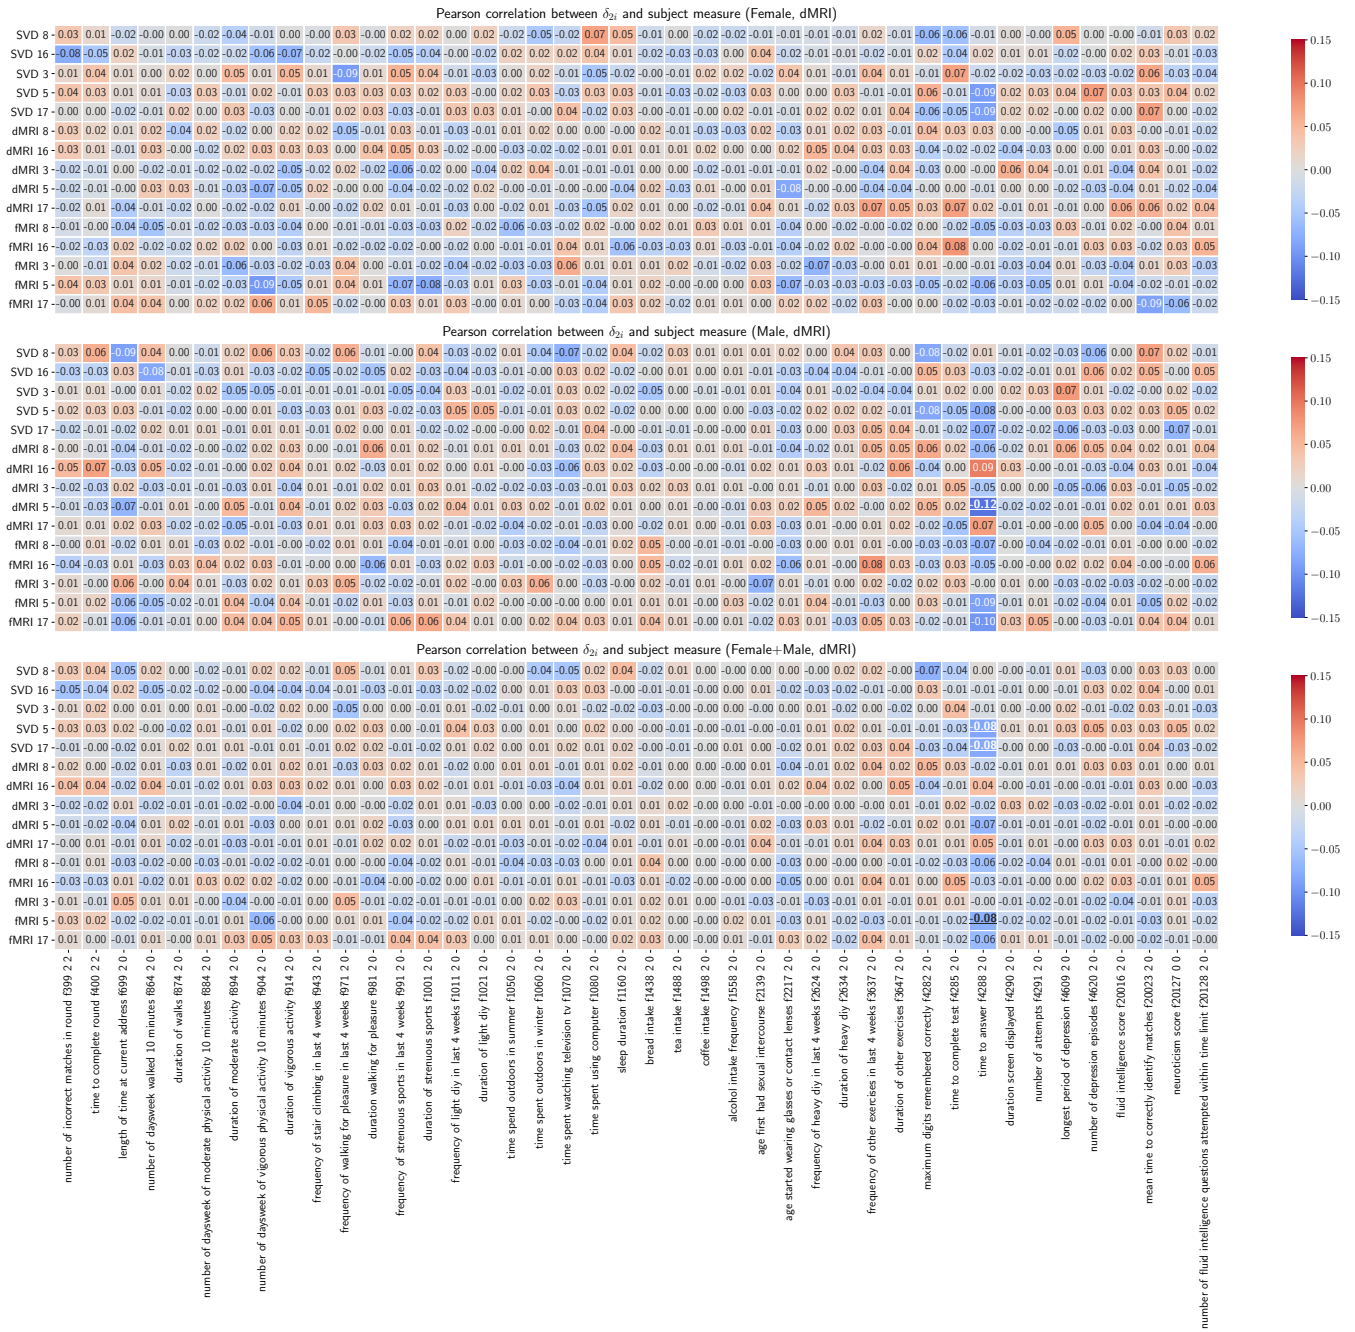

Figure S4: Pearson correlations between  $\delta_{2i}$  vectors (dMRI) and subject measures. Pearson correlations are calculated between 15  $\delta_{2i}$  vectors and 42 variables for each gender and for all subjects. The underscored correlations are significant.

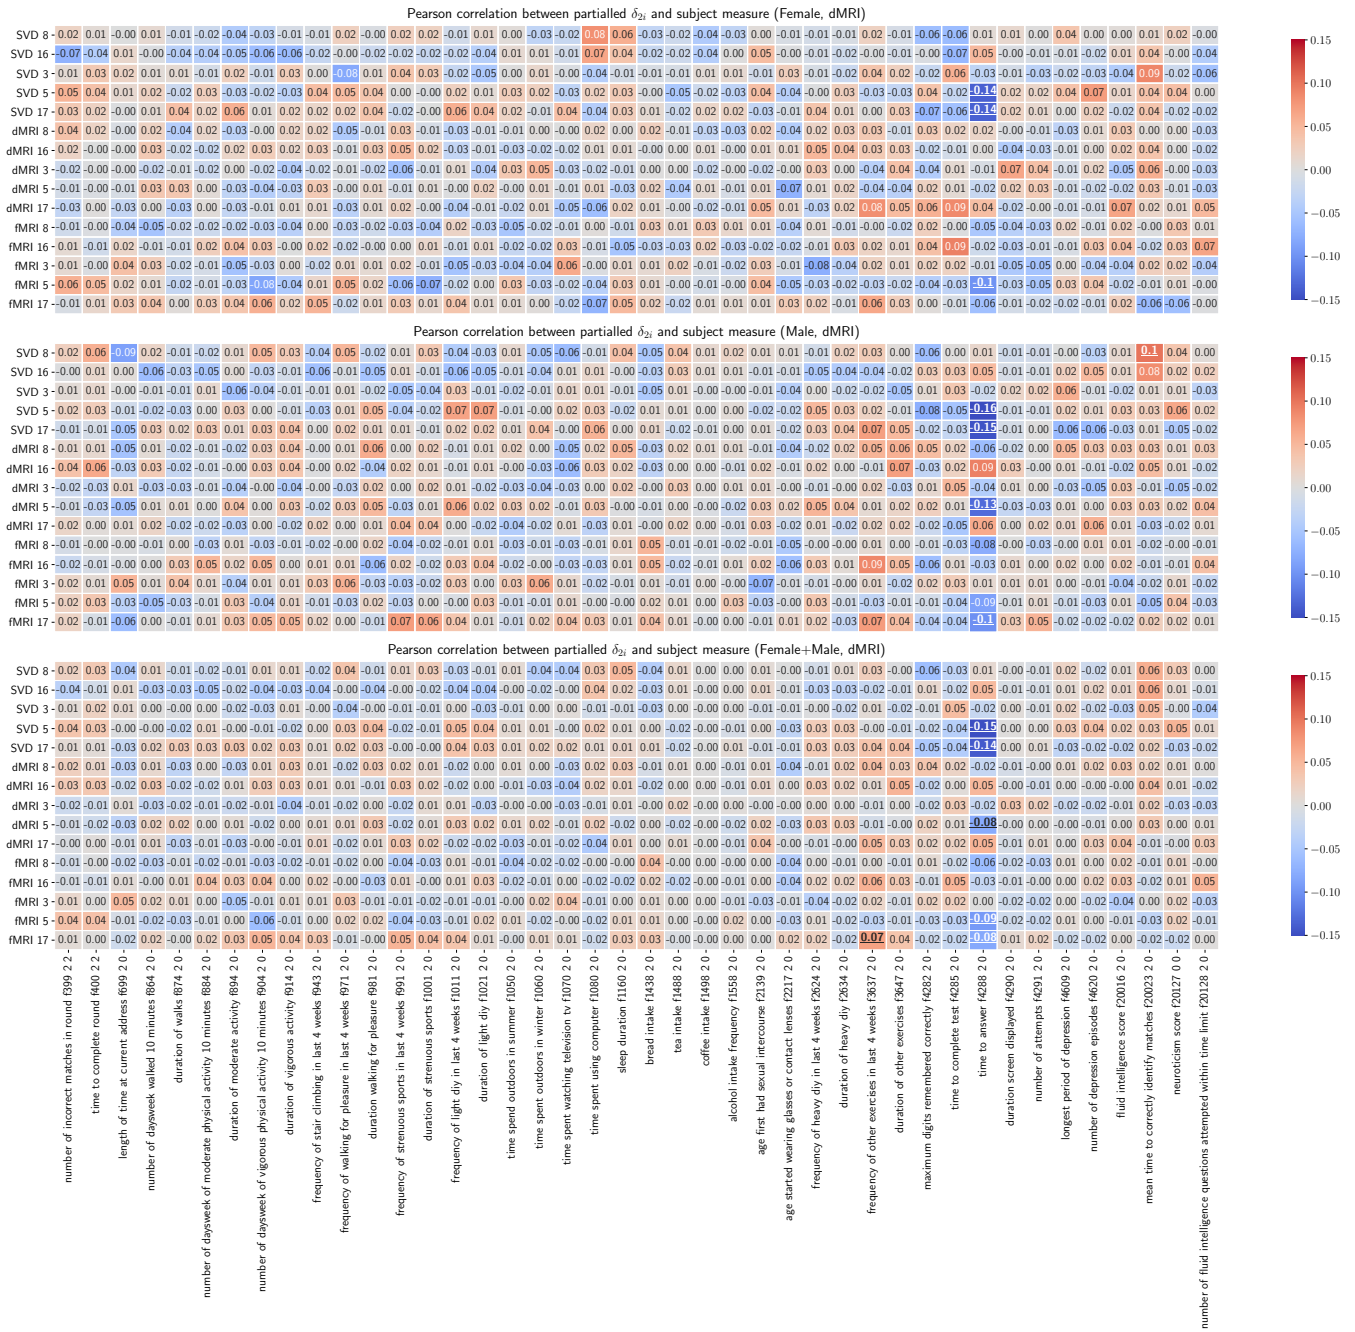

Figure S5: Pearson correlations between partialled  $\delta_{2i}$  vectors (dMRI) and subject measures. Pearson correlations are calculated between 15 partialled  $\delta_{2i}$  vectors and 42 variables for each gender and for all subjects. The underscored correlations are significant.

1096 *S1.6. Sex Effects*

1097 SCVs (9, 10, 17, 22) were significantly associated with sex identified by the MANCOVA analysis  
 1098 and the effect size measure.

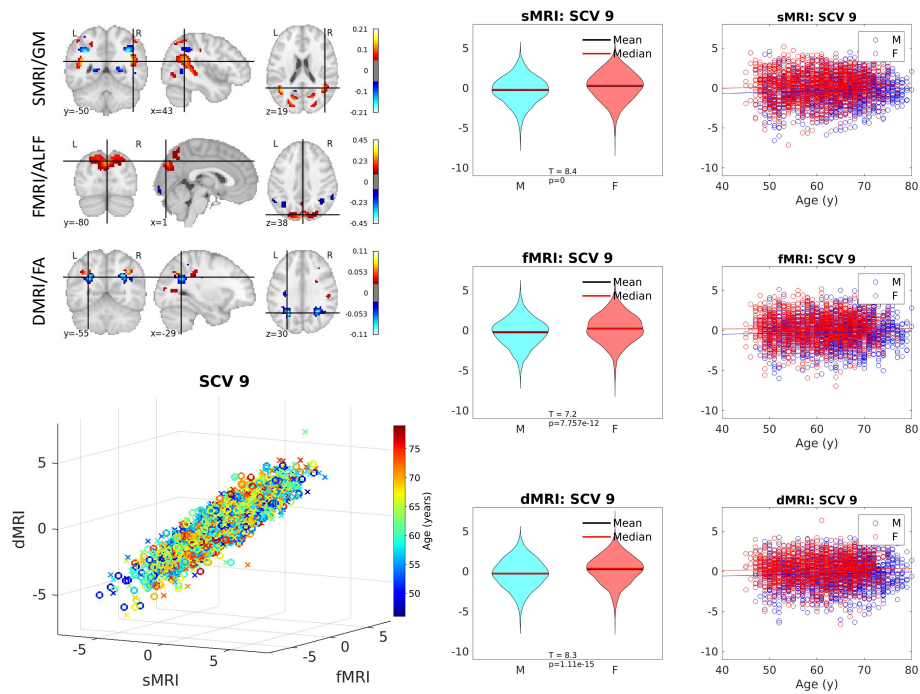

(a) SCV 9

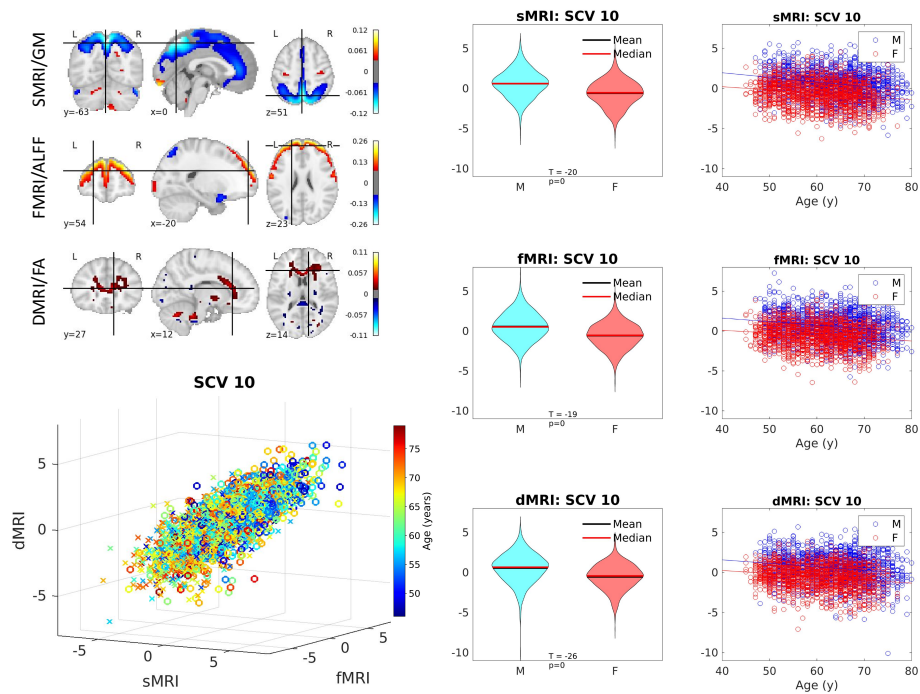

(b) SCV 10



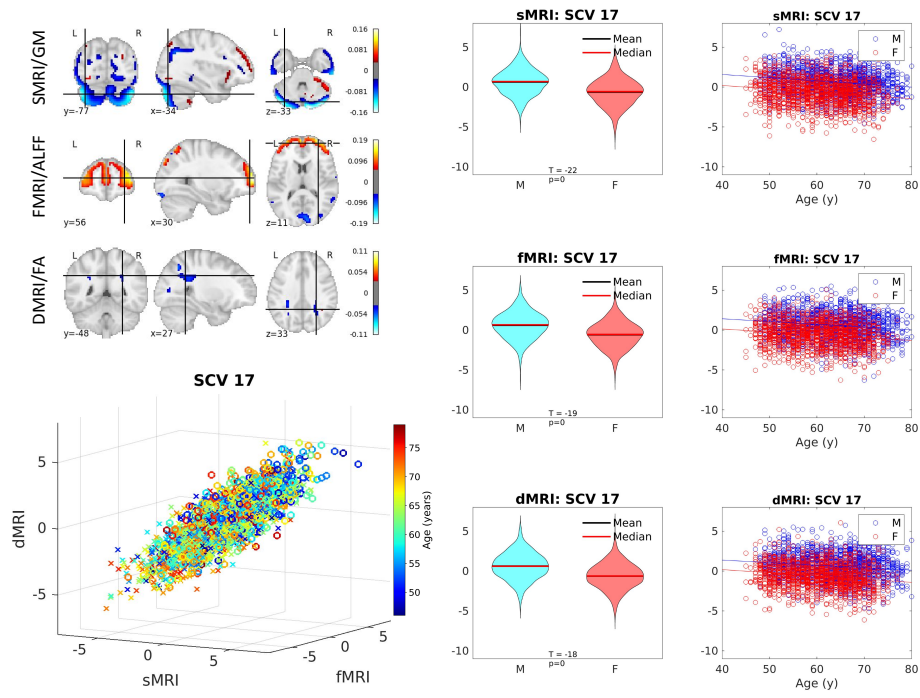

(c) SCV 17

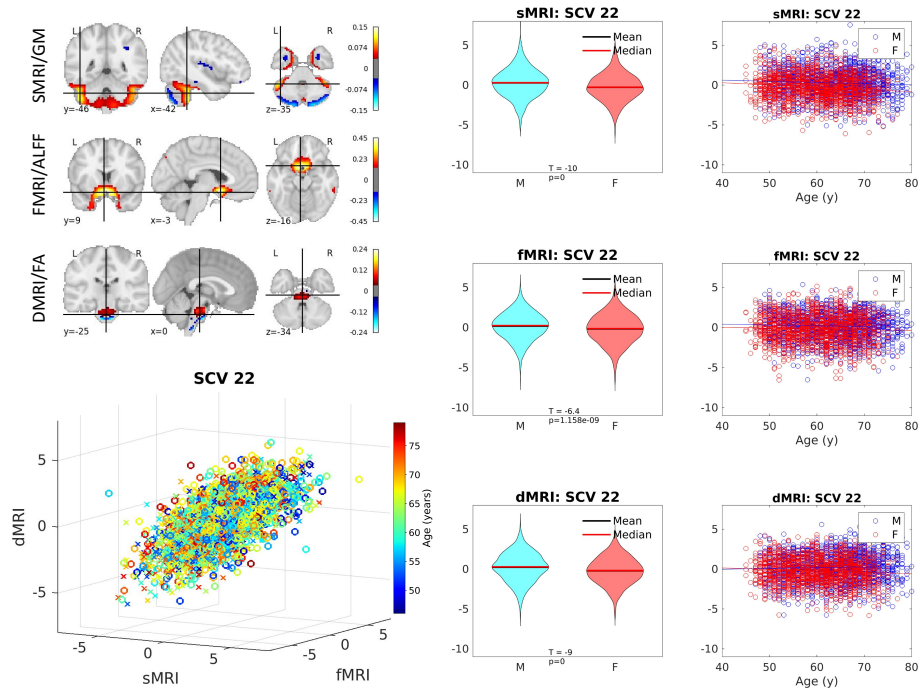

(d) SCV 22

Figure S6: **Sex-related SCV**. Illustration of SCVs 9, 10, 17 and 22. **In each SCV sub-panel:** Top left: Spatial maps. Bottom left: Multimodal subject expression level sources, depicting all subjects (colored by age). Right: Source intensity differences related to sex effects.

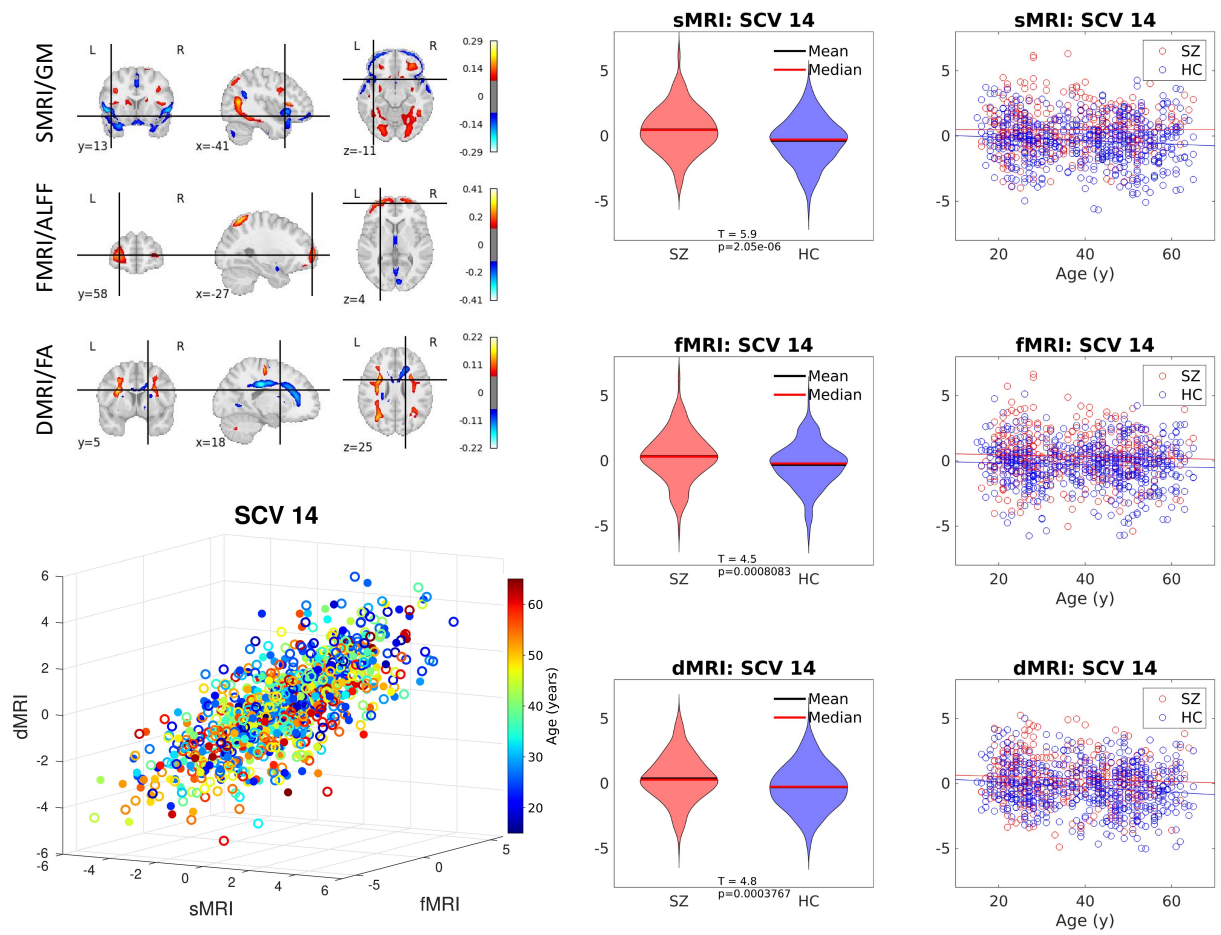

Figure S7: **Schizophrenia-related SCV**. Illustration of SCV 14. Top left: Spatial maps. Bottom left: Multimodal subject expression level sources, depicting all subjects (colored by age). Right: Source intensity differences related to schizophrenia effects.

1100 *S1.8. Effect Size Measure (UK Biobank Dataset)*

1101 We fit a linear regression model using phenotype scores to predict SCVs for each of three modalities.  
1102 Specific phenotypes showing significant association from MANCOVA for each modality are listed as  
1103 follows:

- 1104 • sMRI: sex, time spent watching television, age first had sexual intercourse, time to answer, fluid  
1105 intelligence score, age when attended assessment centre, first principal component of physical  
1106 exercise variables, spatial normalization, sex and age interaction.
- 1107 • fMRI: alcohol intake frequency, sex, sleep duration, age first had sexual intercourse, time to  
1108 answer, fluid intelligence score, age when attended assessment centre, third principal component  
1109 of physical exercise variables, spatial normalization, mean framewise displacement, sex and age  
1110 interaction.
- 1111 • dMRI: sex, time spent watching television, time to answer, fluid intelligence score, mean time  
1112 to correctly identify matches, age when attended assessment centre, spatial normalization, sex  
1113 and age interaction.

1114 For a categorical variable with more than two categories, such as alcohol intake frequency with six  
1115 categories, we fit another linear regression model without the categorical variable, namely a reduced  
1116 model. We obtained the statistics of the categorical variable from the ANOVA analysis between the  
1117 reduced model and full model.

1118 We replaced Type II effect size measures with Type III effect size measures for SCVs having  
1119 significant age and sex interactions. The SCVs below have significant age and sex interactions  
1120 ( $p < 0.05$ , Bonferroni correction) and their Type II effect size measures are replaced by Type III effect  
1121 size measures:

- 1122 • sMRI: 6, 11, 18, 21, 23, 24, 28.
- 1123 • fMRI: 18, 25.
- 1124 • dMRI: 6, 18, 22, 26.

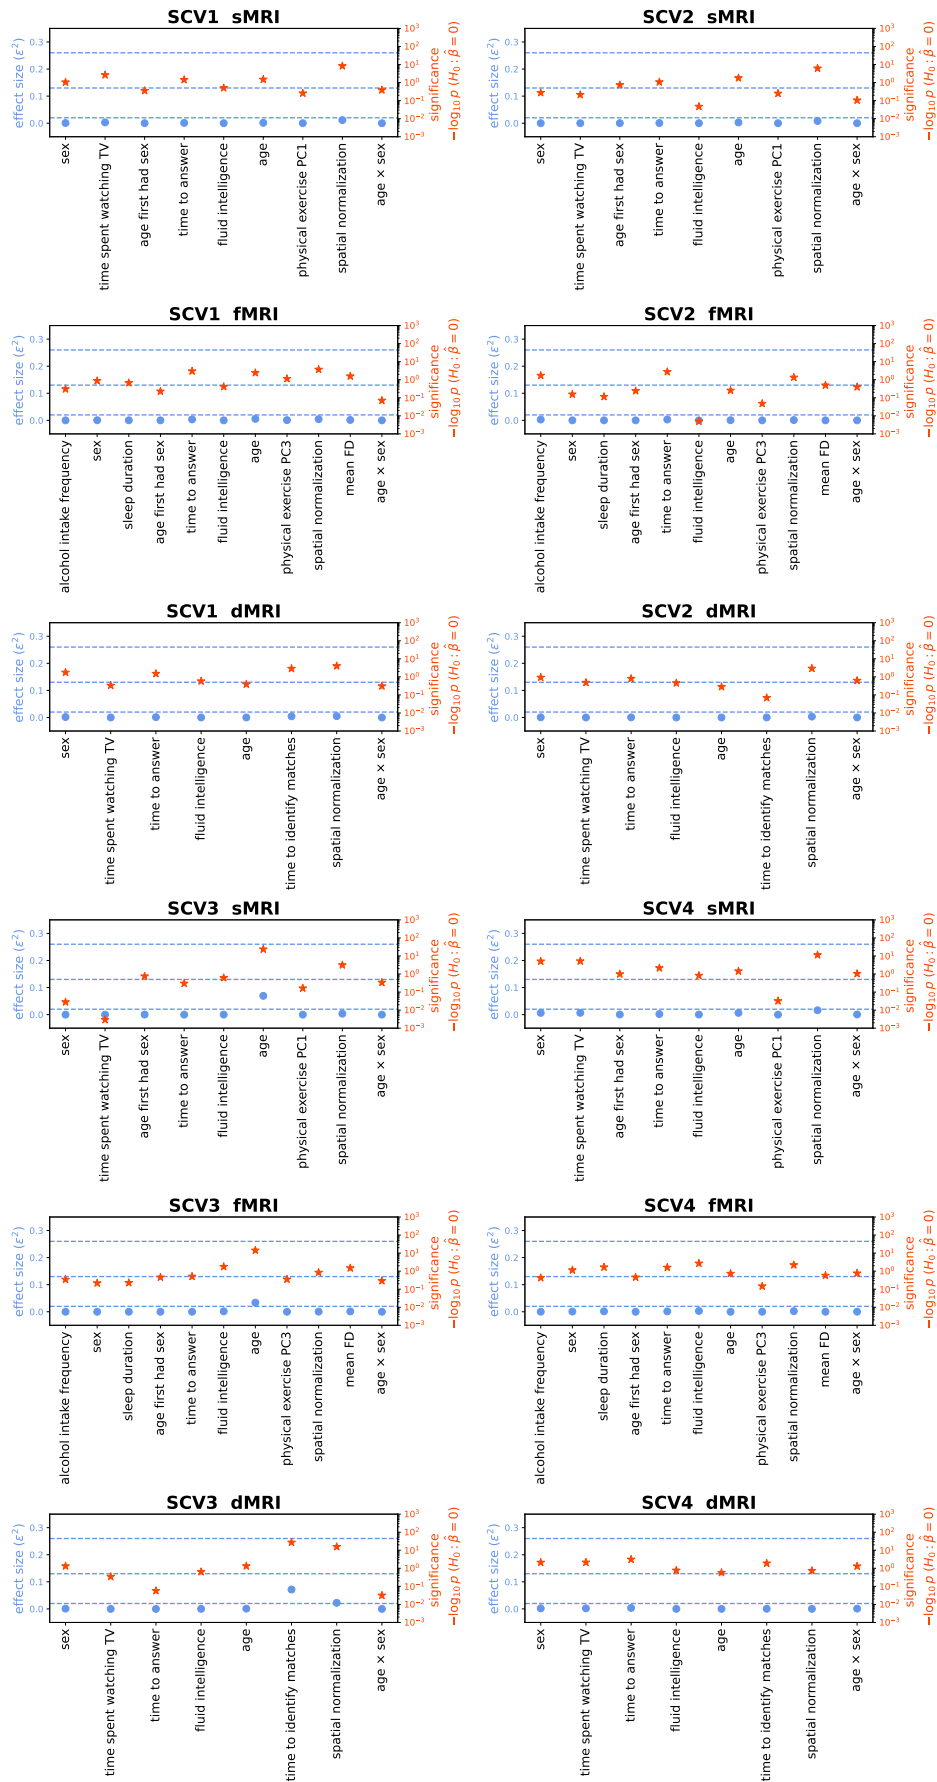

(a) SCVs 1-4

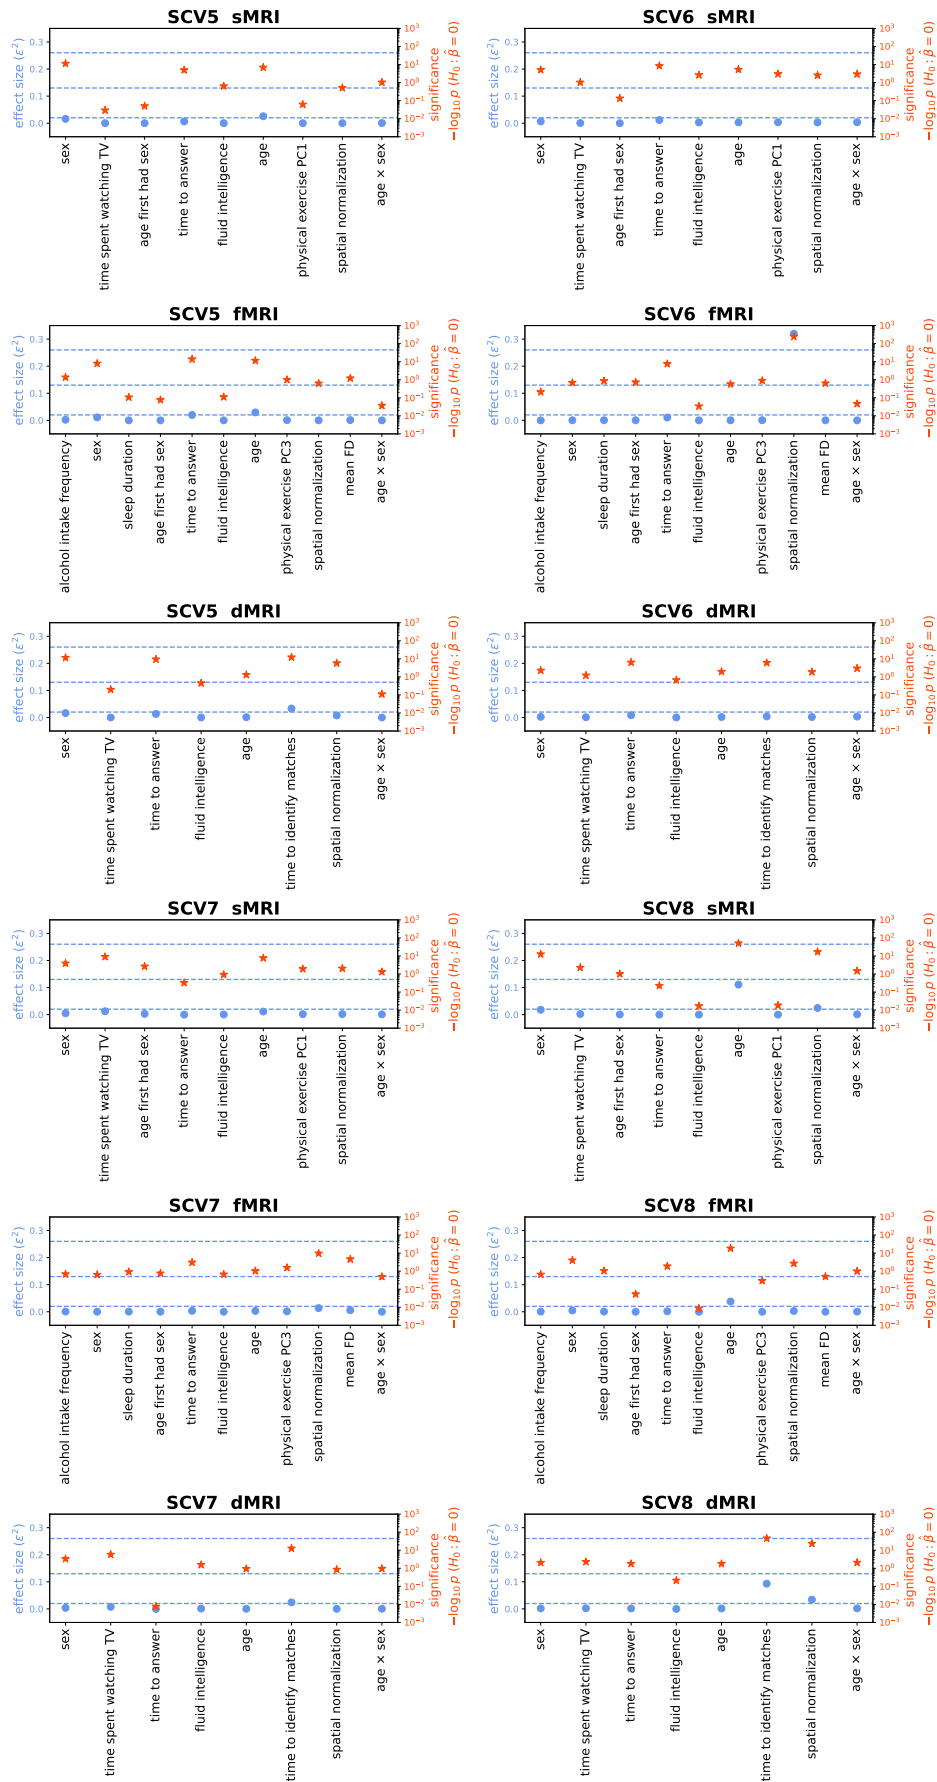

(b) SCVs 5-8

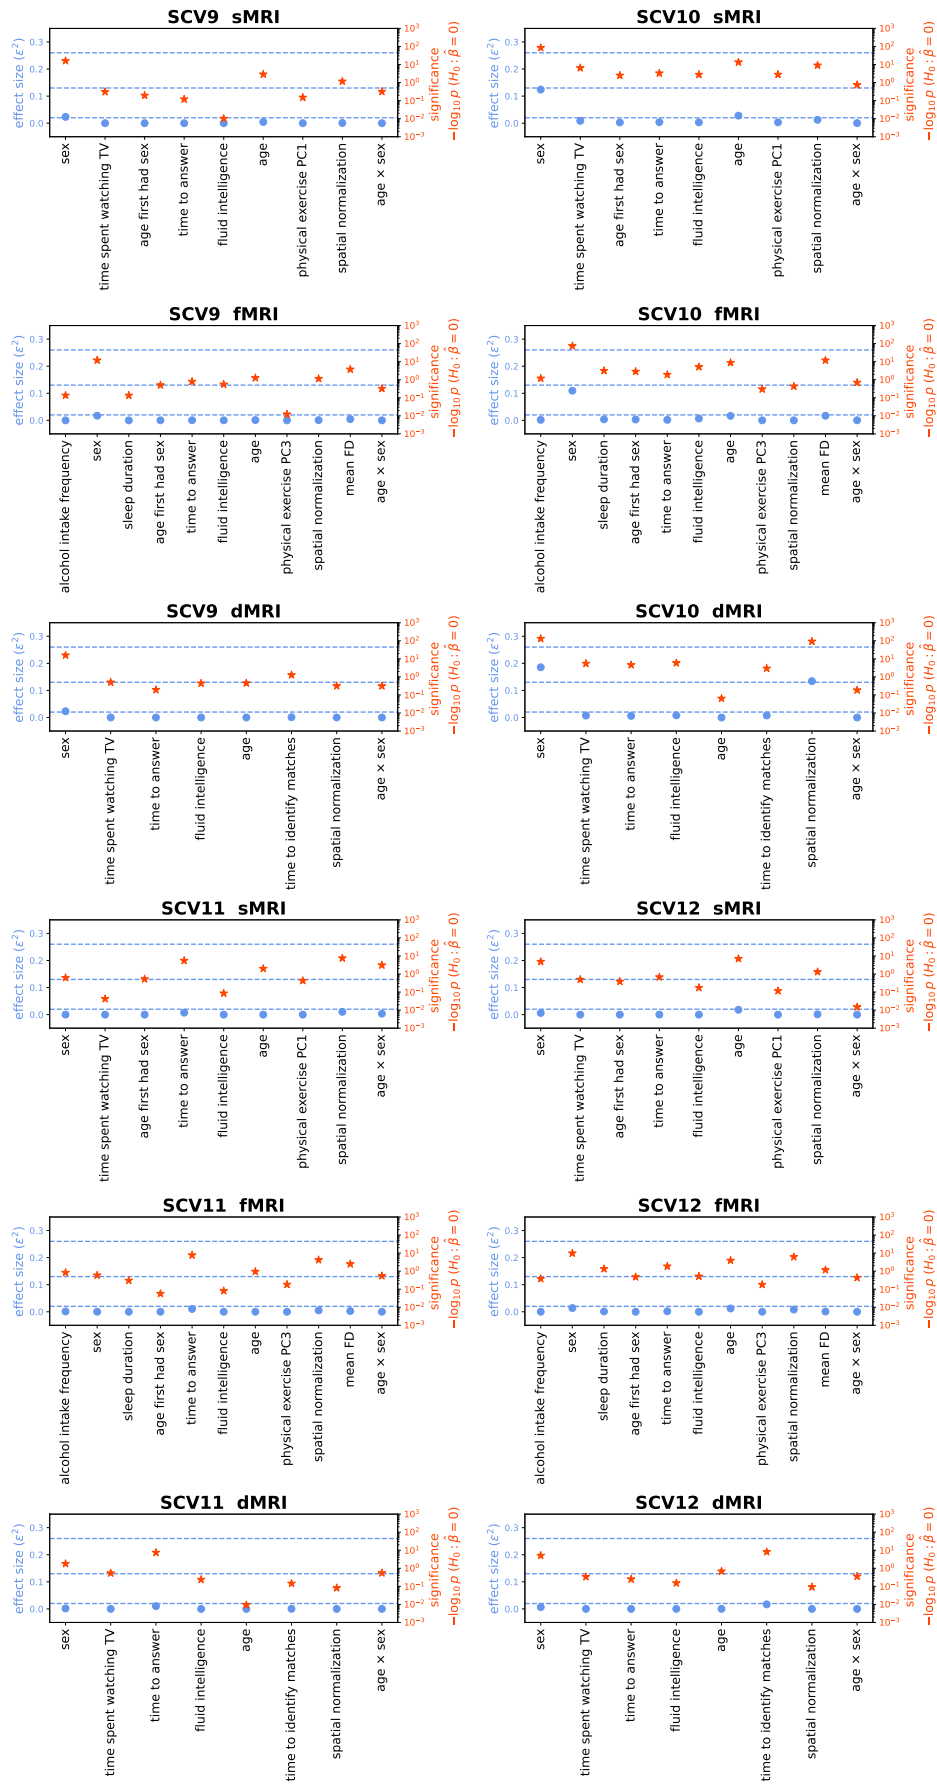

(c) SCVs 9-12

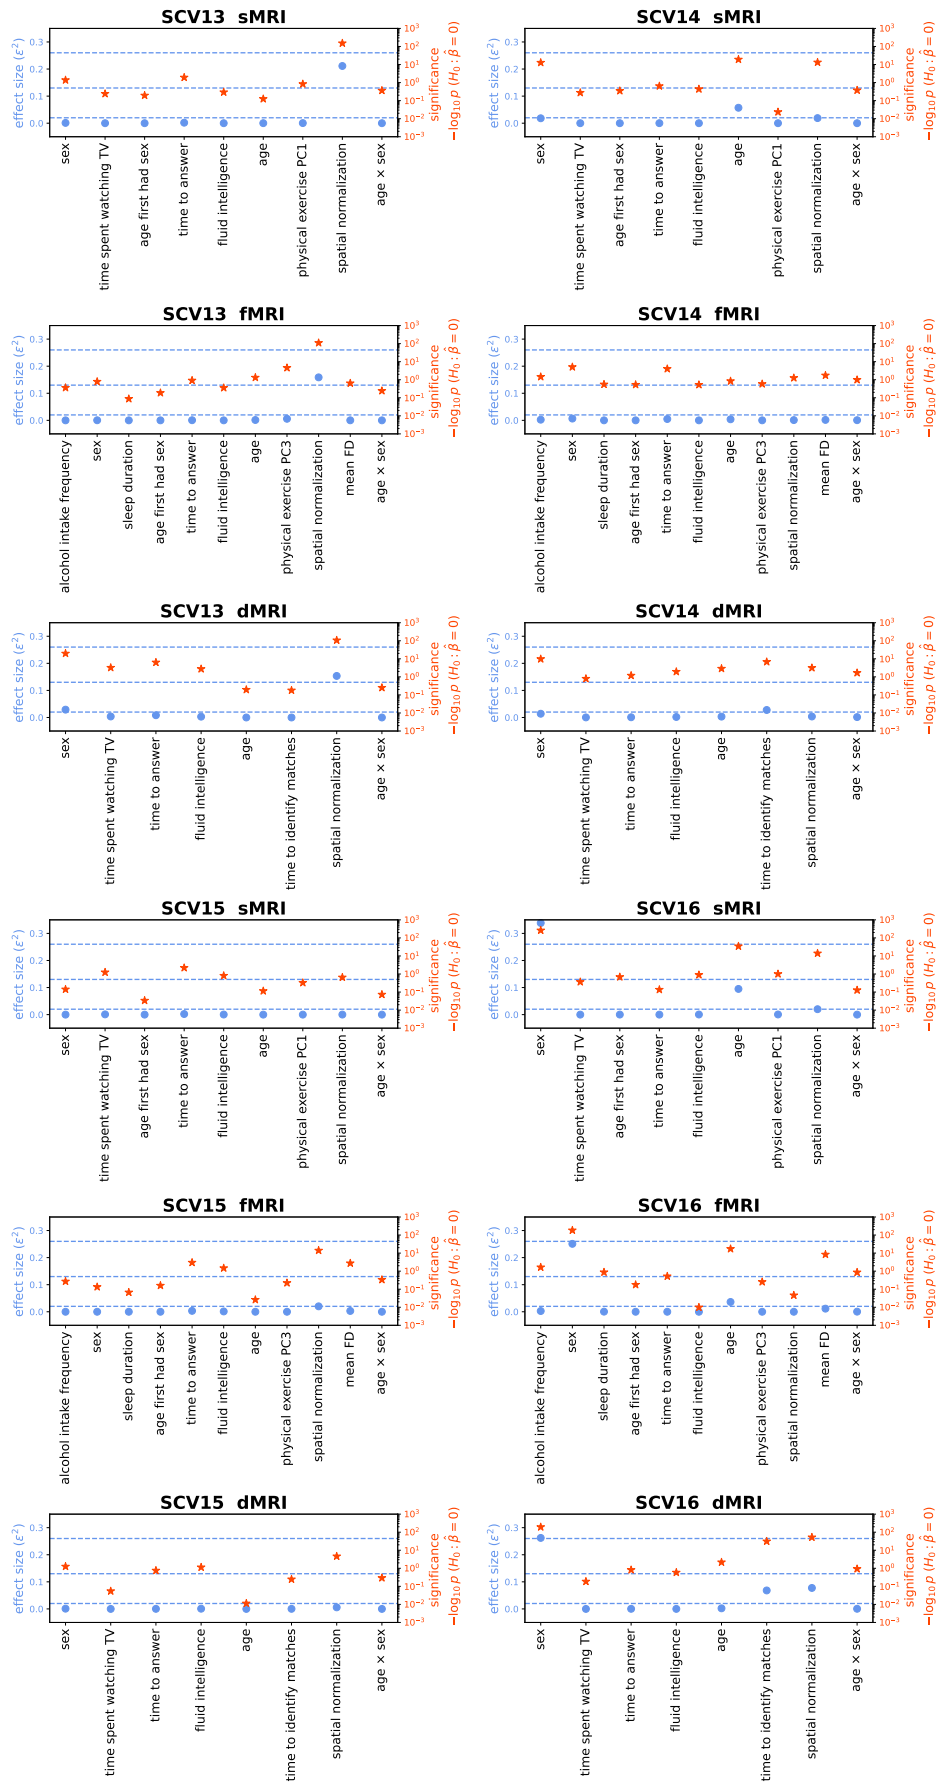

(d) SCVs 13-16

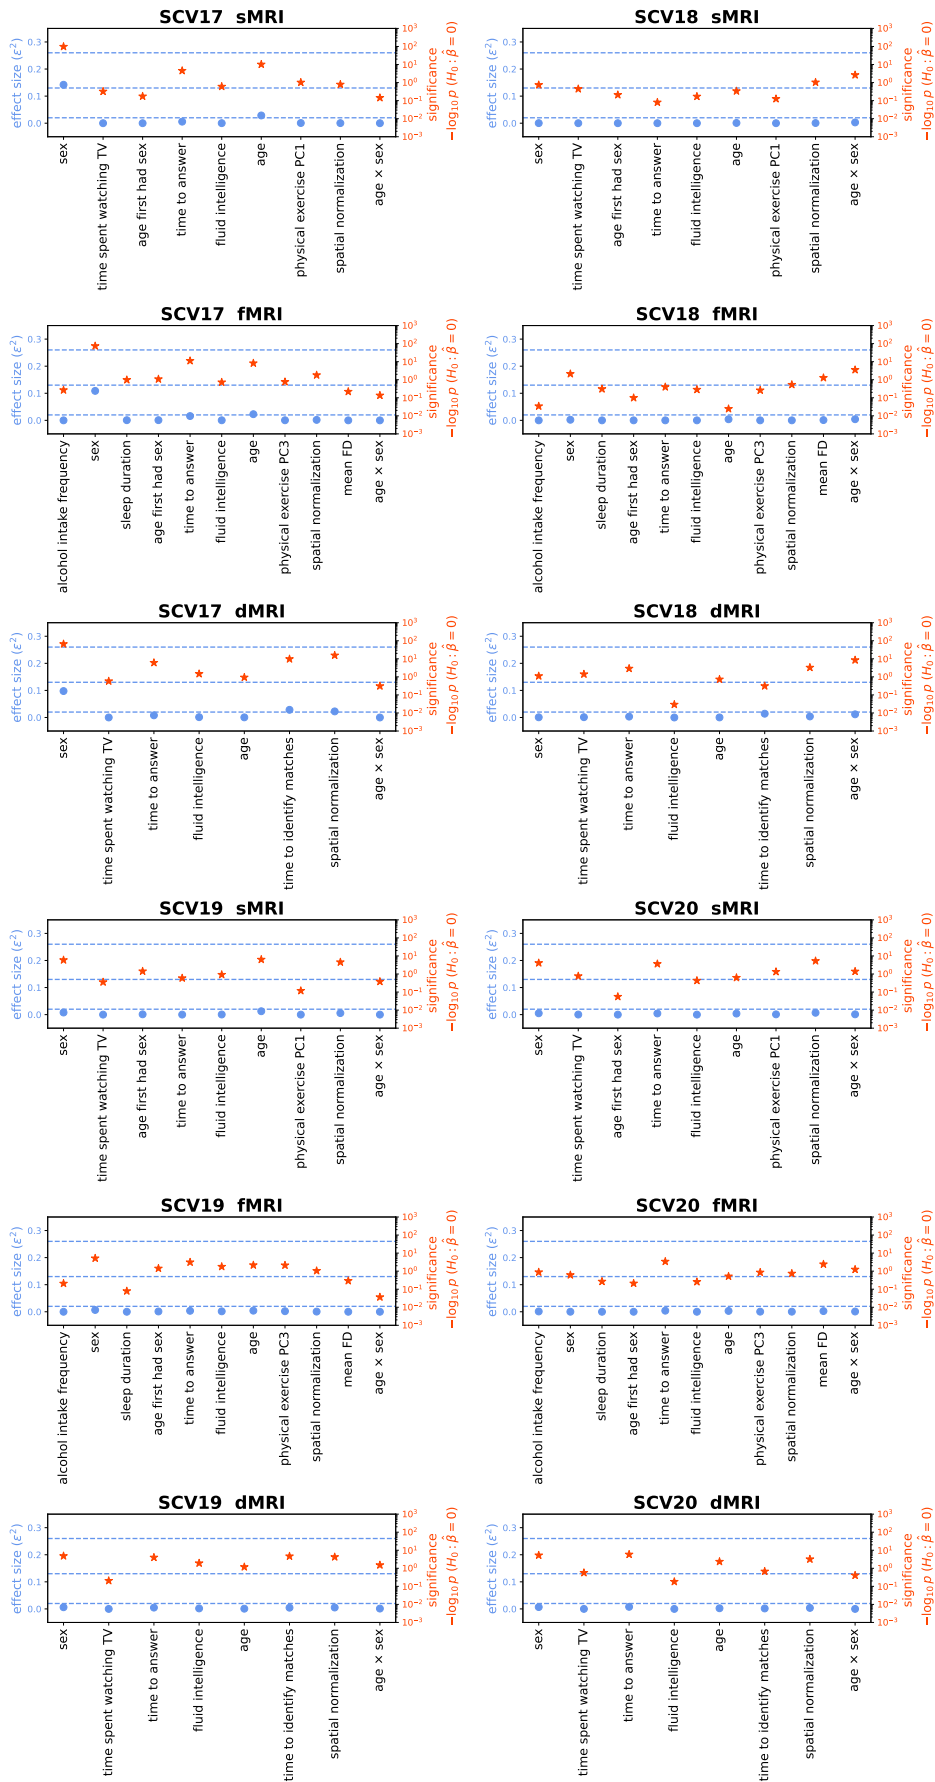

(e) SCVs 17-20



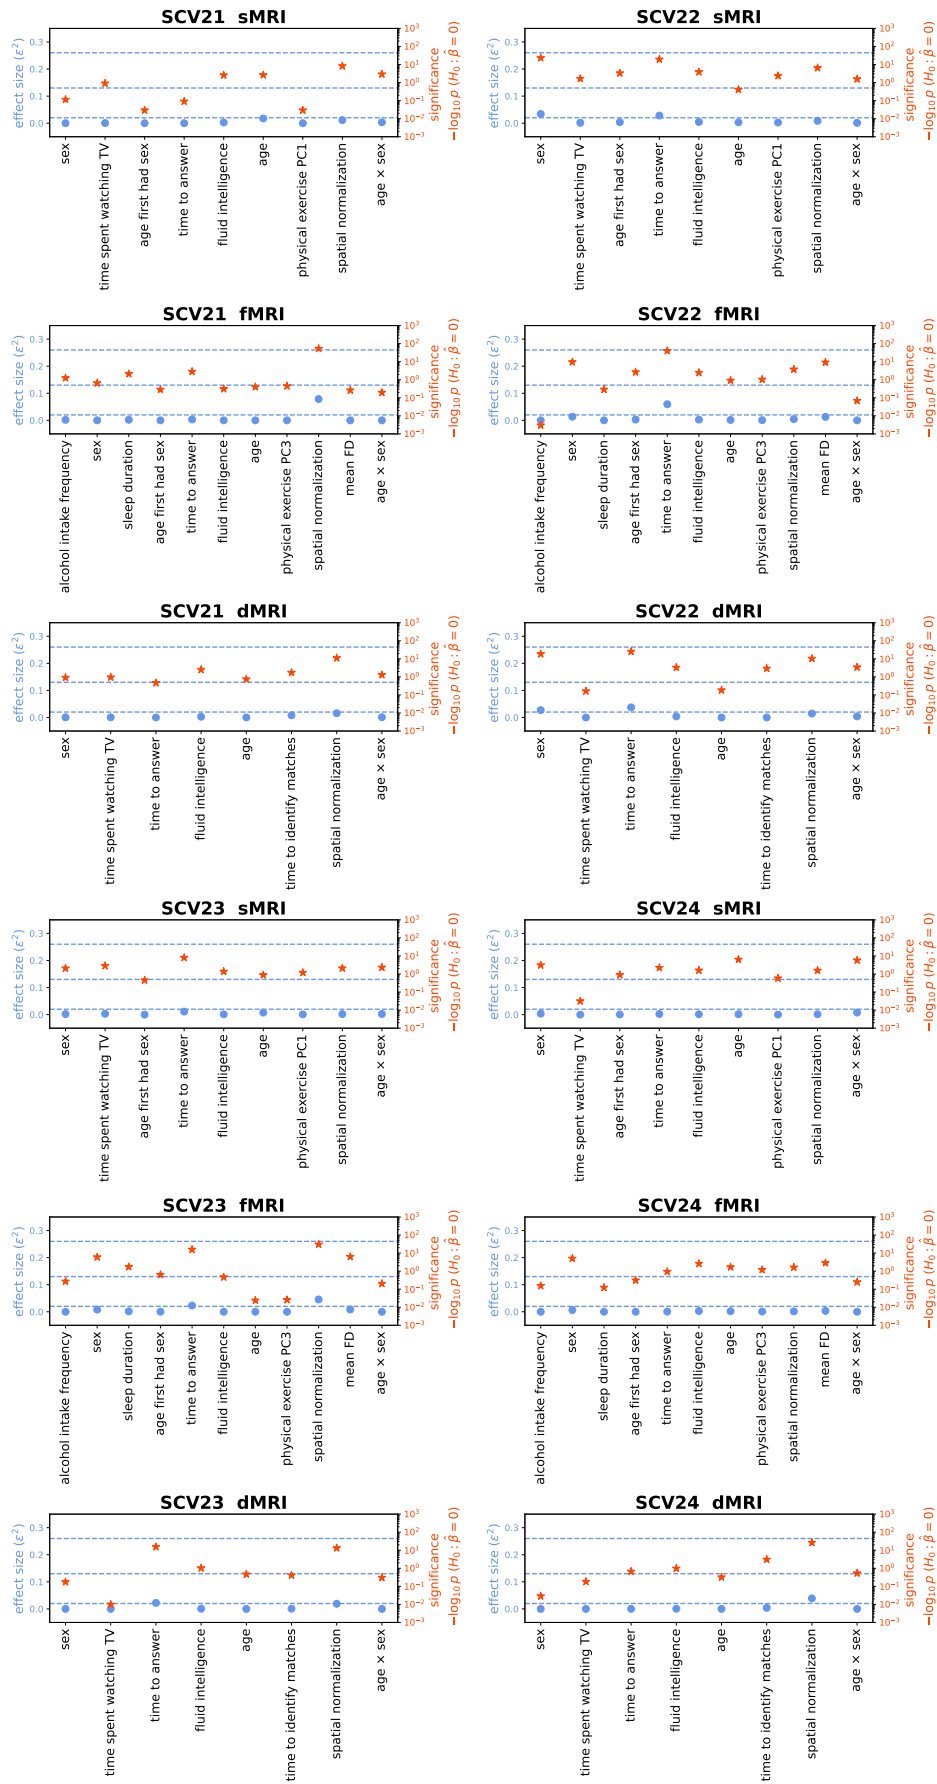

(f) SCVs 21-24

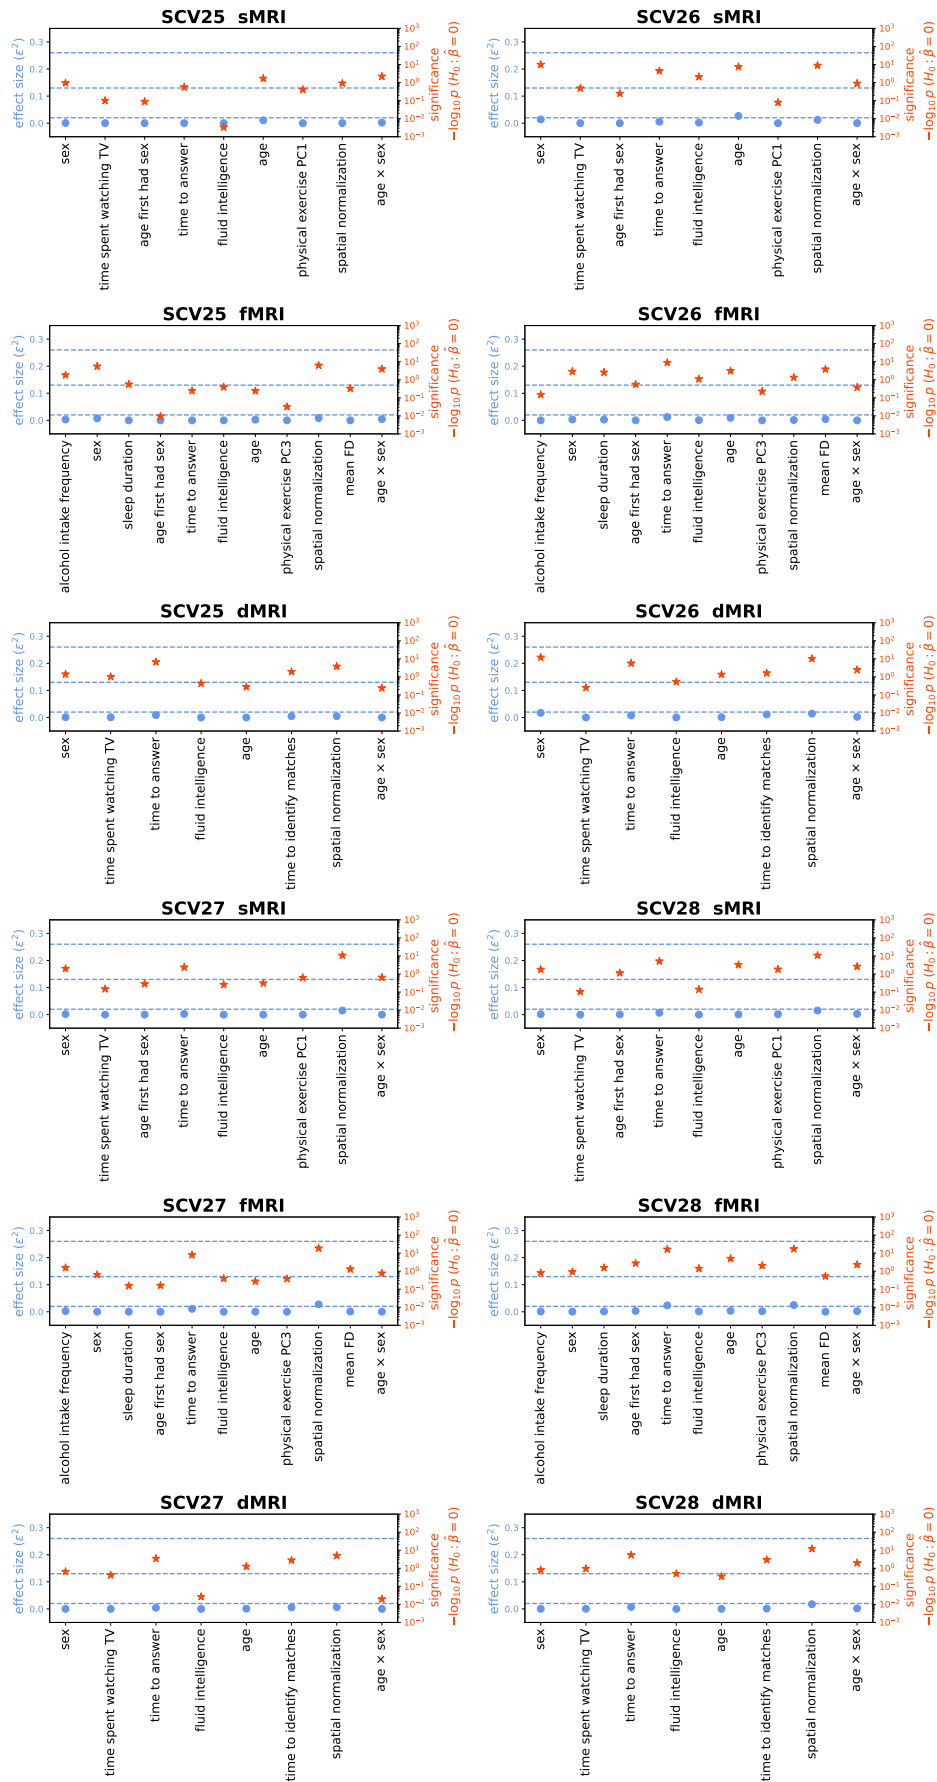

(g) SCVs 25-28

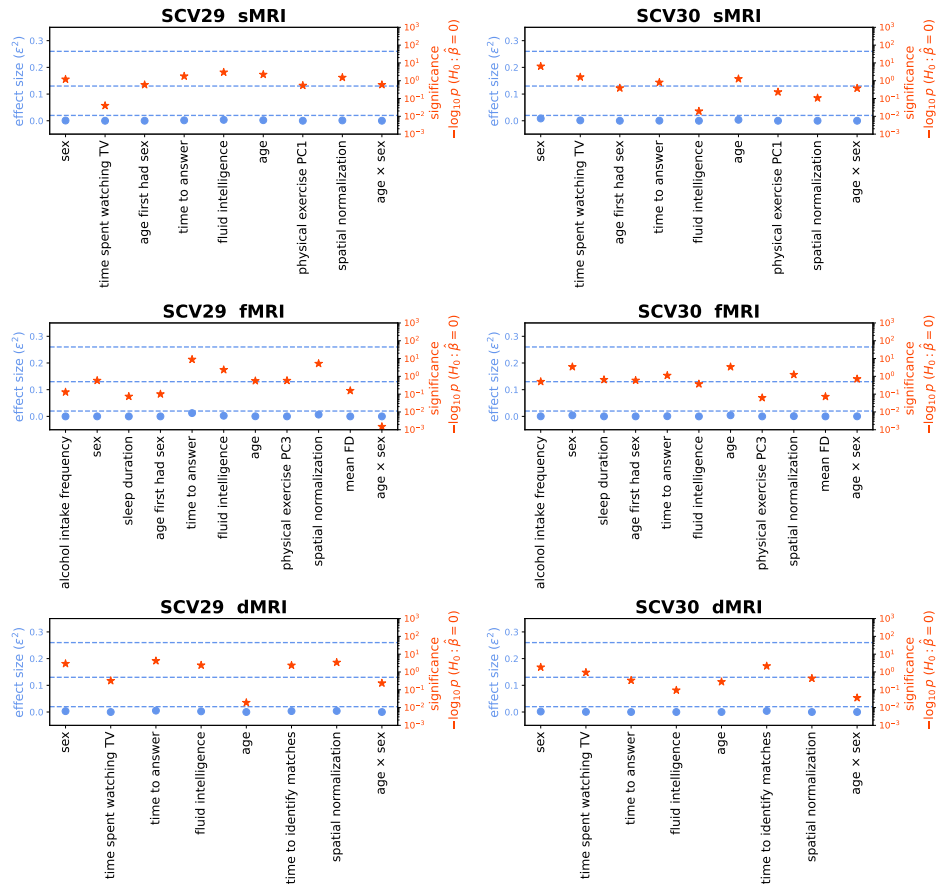

(h) SCVs 29-30

Figure S8: **Effect Size Measure (UK Biobank Dataset)**. Red star indicates significance level, while blue dot indicates effect size. Blue horizontal dashed lines from bottom to top indicate thresholds for small ( $\epsilon^2 = 0.02$ ), medium ( $\epsilon^2 = 0.13$ ), and large ( $\epsilon^2 = 0.26$ ) effect sizes, respectively.

1125 *S1.9. Effect Size Measure (Patient Dataset)*

1126 For the patient dataset, we fit linear models using the same 7 variables (age, sex, diagnosis, the  
1127 interaction between age and sex, the interaction between age and diagnosis, the interaction between  
1128 sex and diagnosis, the interaction among age, sex and diagnosis) to predict unimodal sources in  
1129 each of the three modalities, with 2 additional variables (spatial normalization and mean framewise  
1130 displacement) included for fMRI.

1131 For a categorical variable with more than two categories, such as diagnosis with six categories,  
1132 we fit another linear regression model without the categorical variable and its interaction(s), namely  
1133 a reduced model. We obtained the statistics of the categorical variable from the ANOVA analysis  
1134 between the reduced model and full model.

1135 No interaction terms were significant, so only Type II effect sizes are reported (except for dMRI  
1136 of SCV 5).

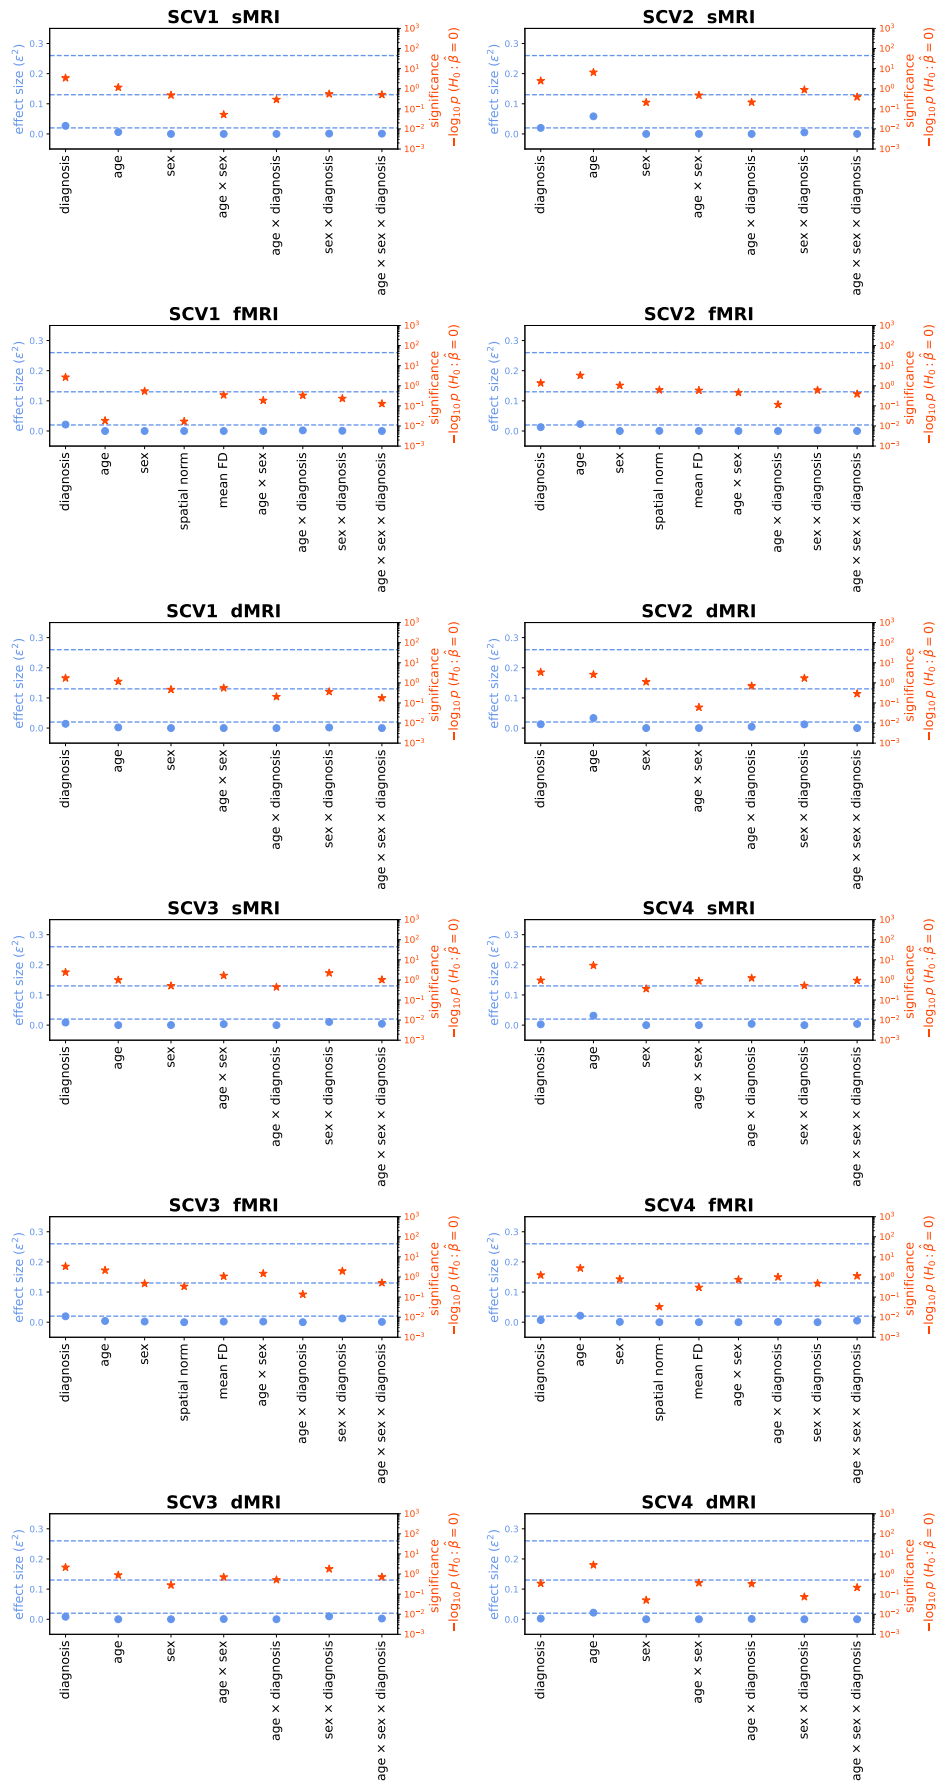

(a) SCVs 1-4

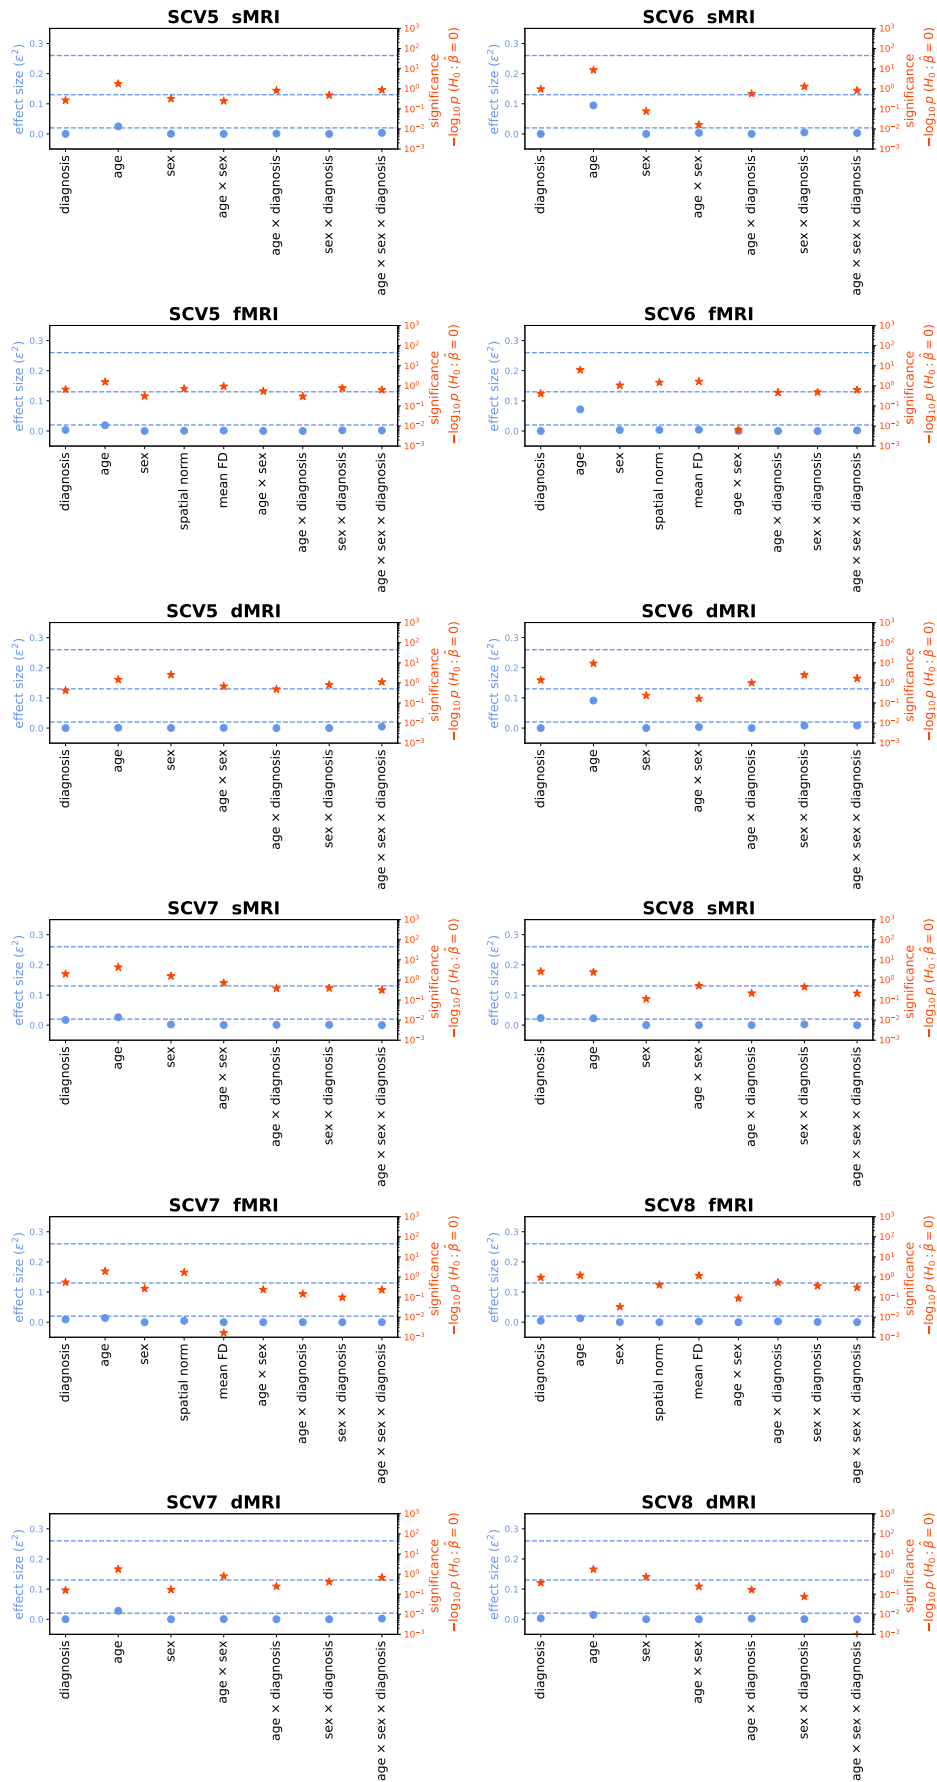

(b) SCVs 5-8

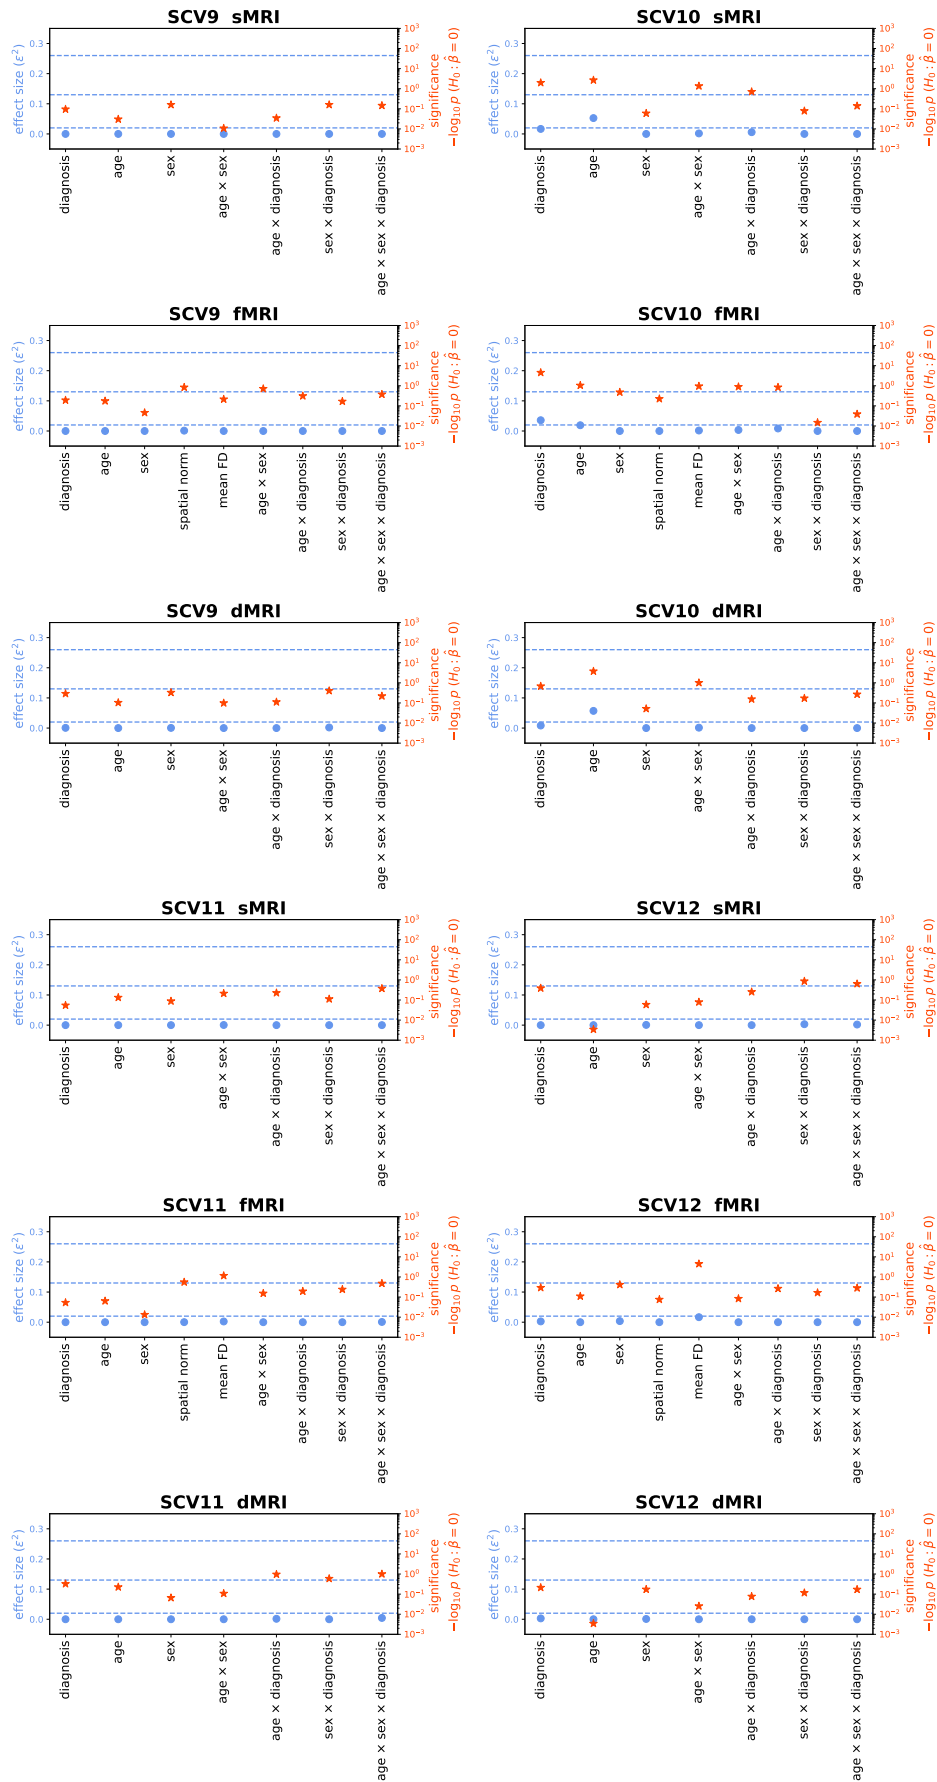

(c) SCVs 9-12

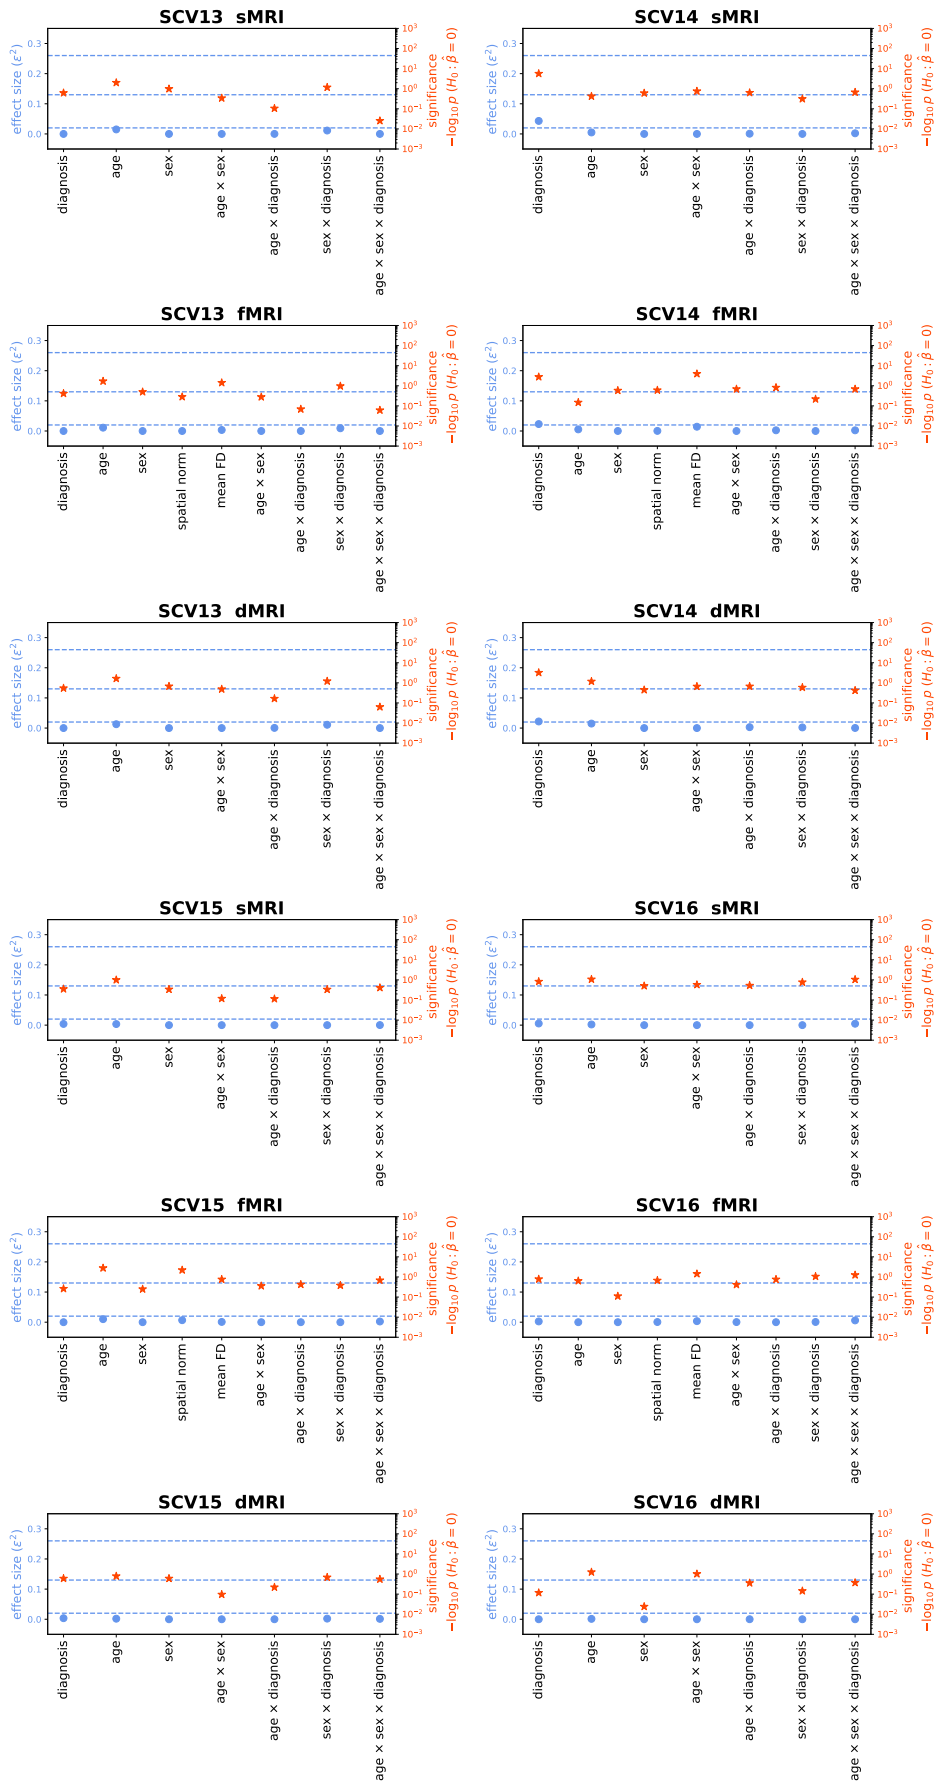

(d) SCVs 13-16



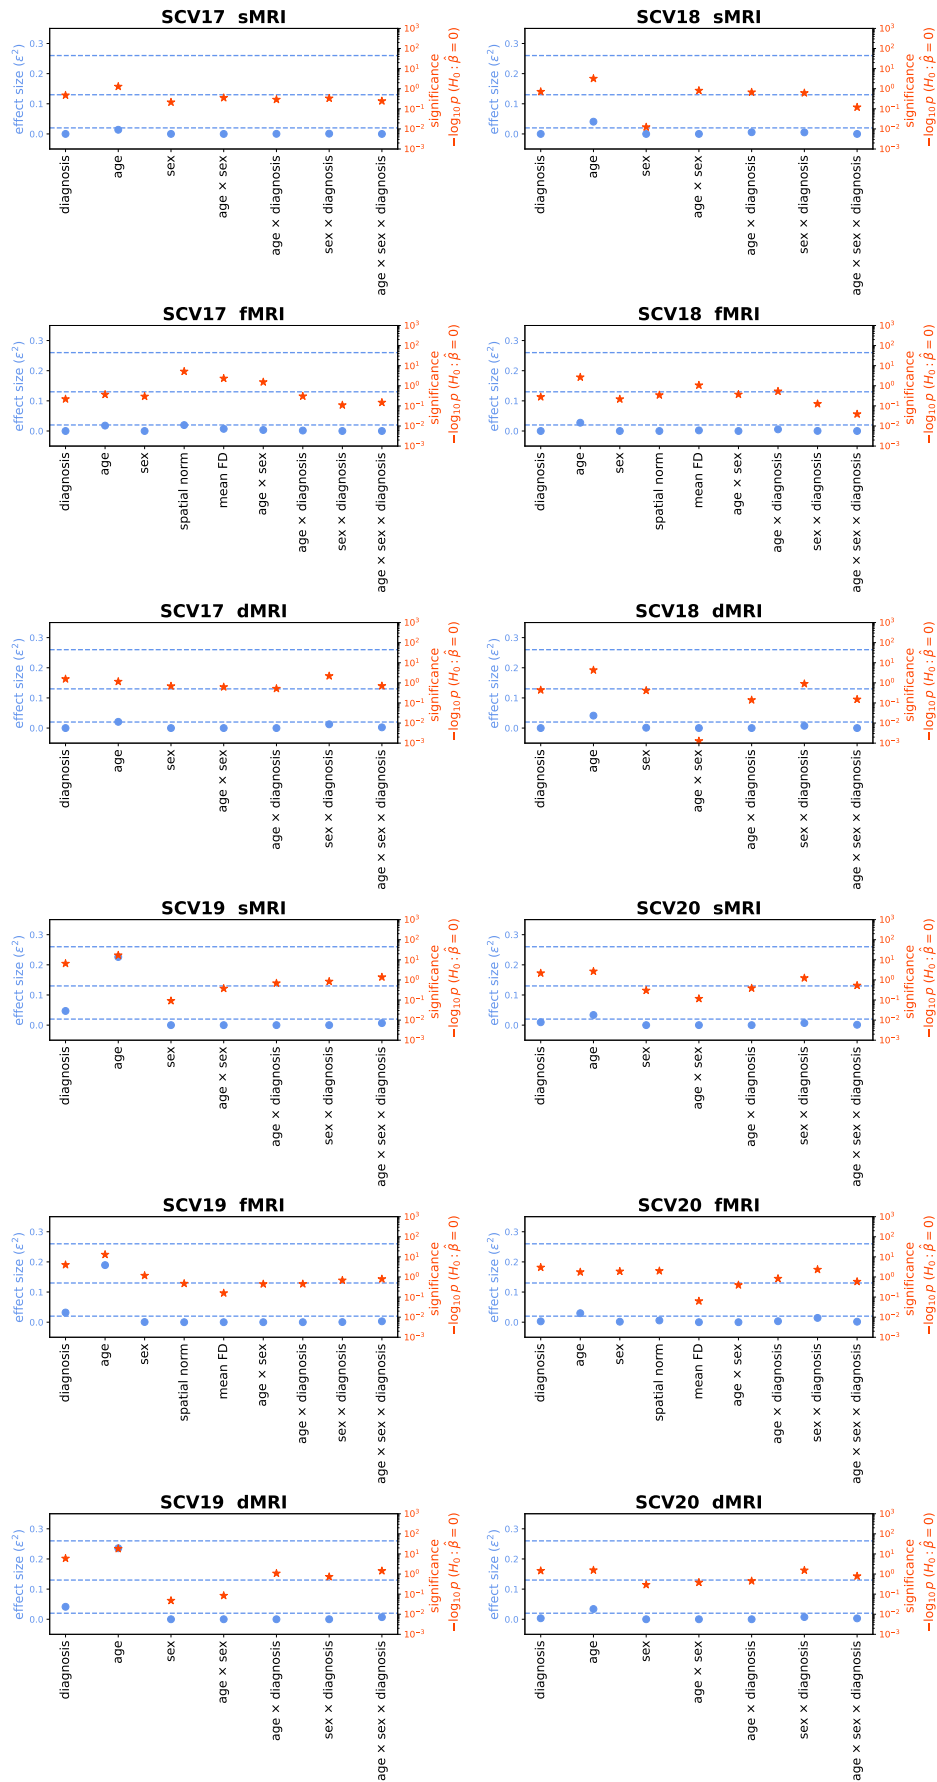

(e) SCVs 17-20

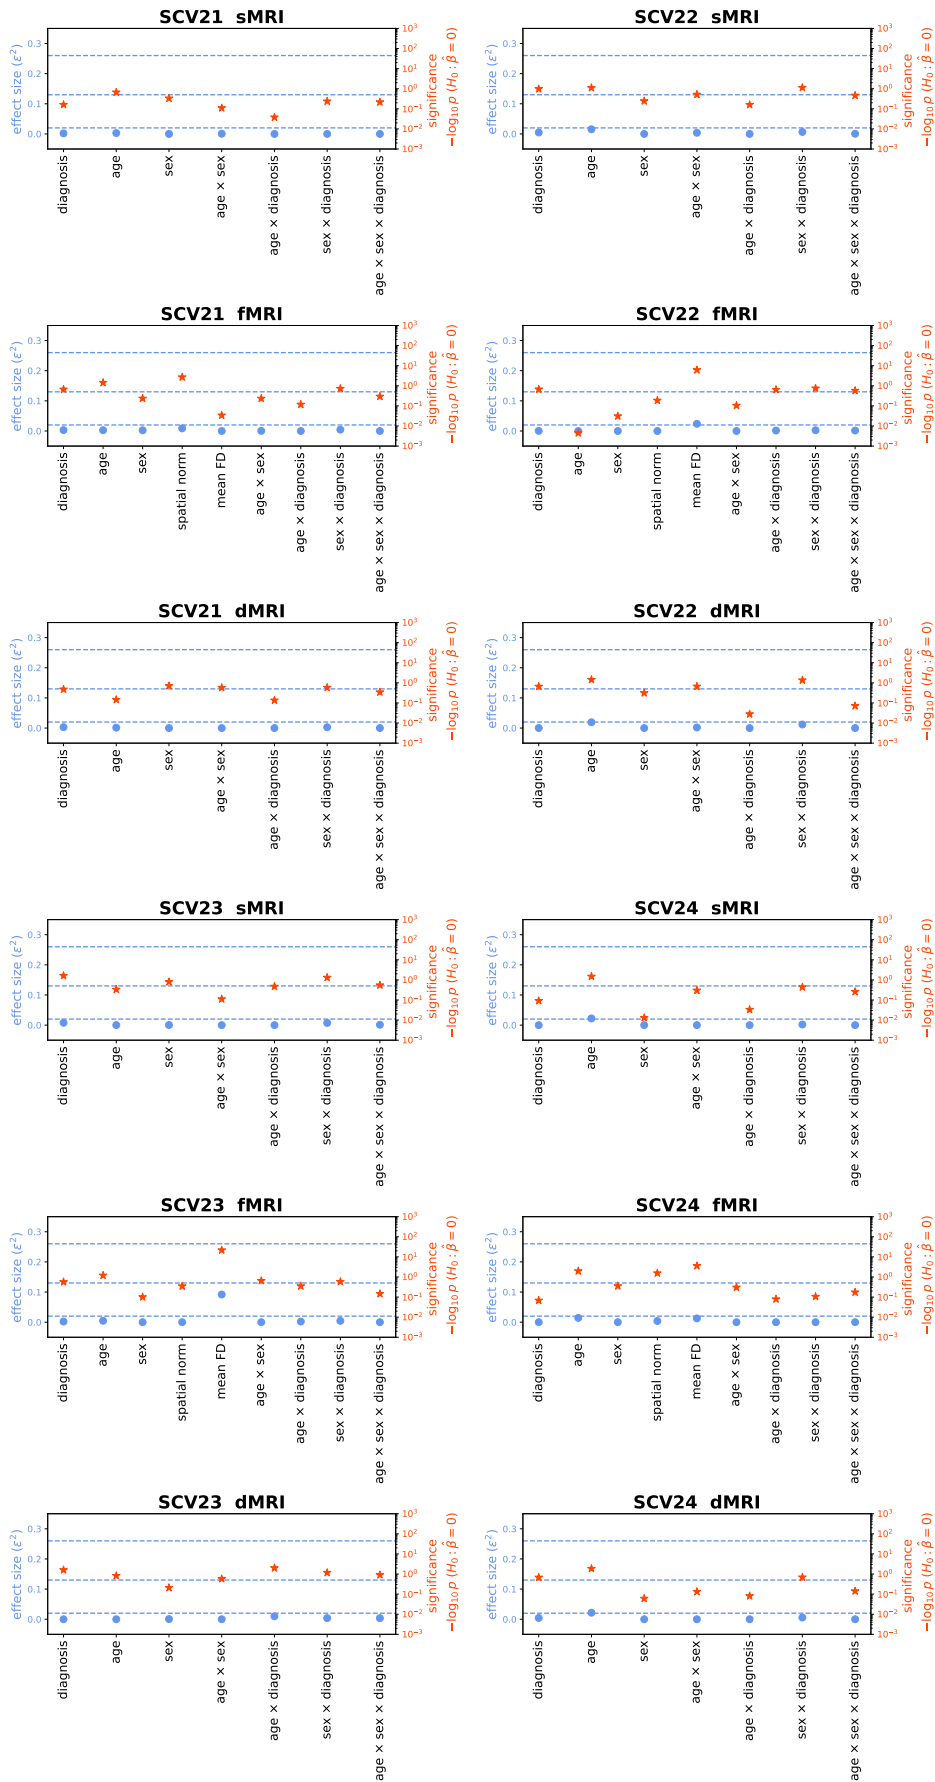

(f) SCVs 21-24

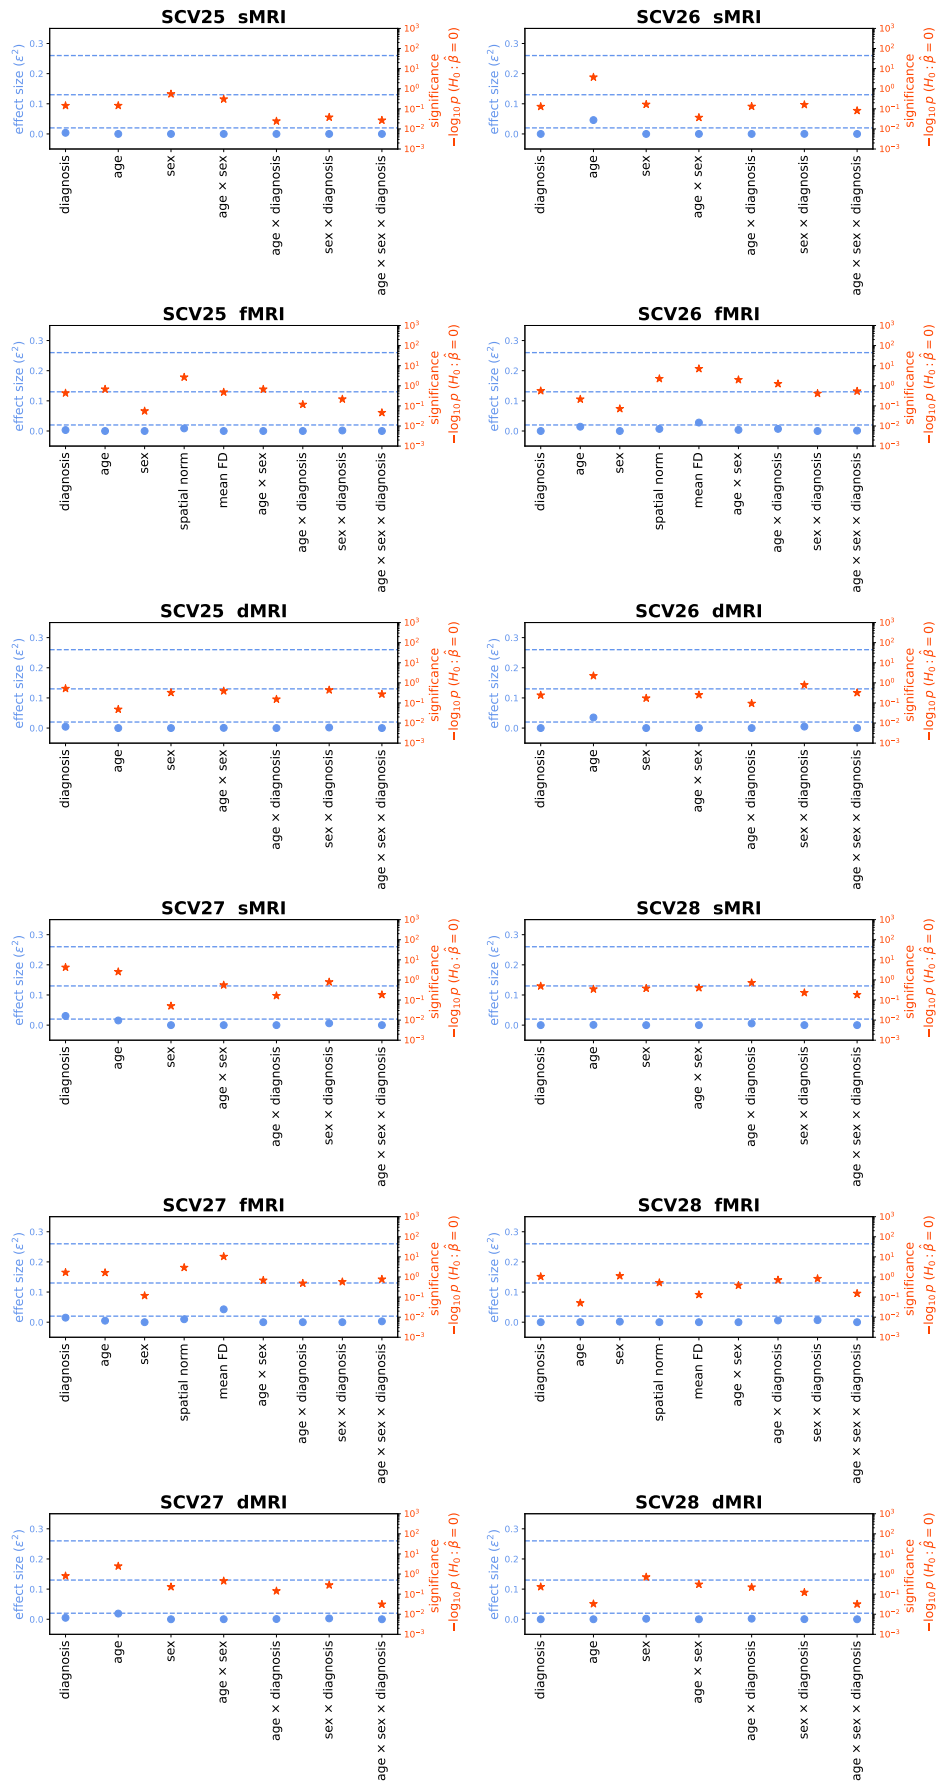

(g) SCVs 25-28

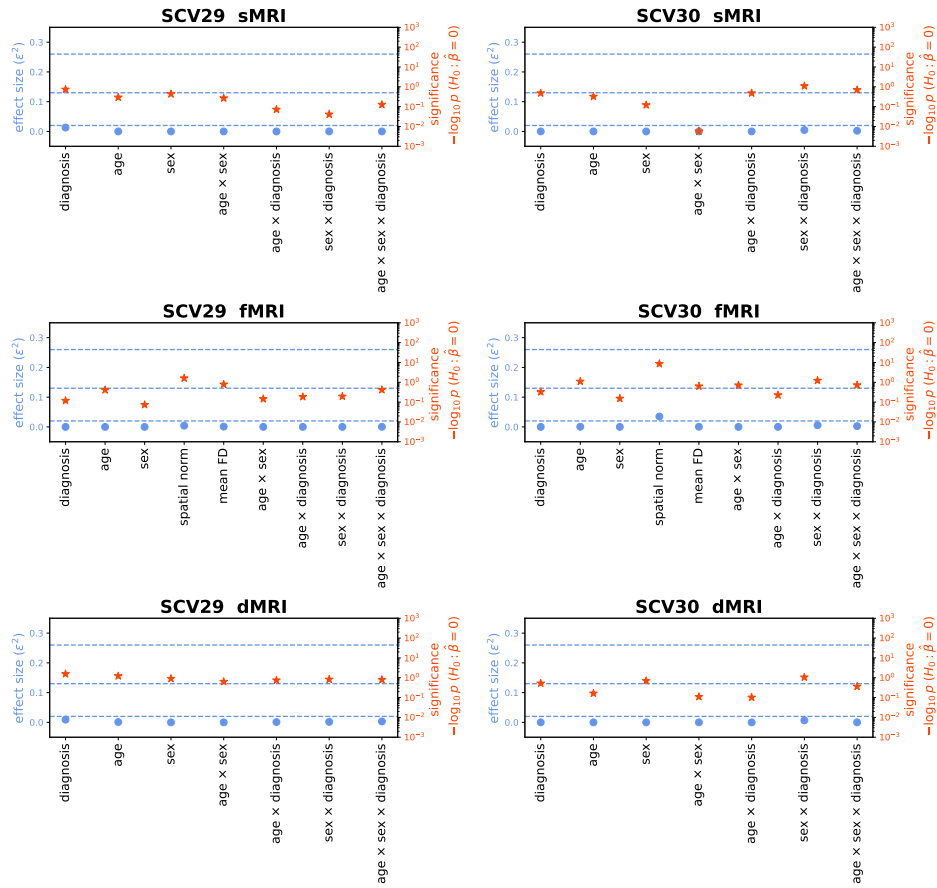

(h) SCVs 29-30

Figure S9: **Effect Size Measure (Patient Dataset)**. Red star indicates significance level, while blue dot indicates effect size. Blue horizontal dashed lines from bottom to top indicate thresholds for small ( $\epsilon^2 = 0.02$ ), medium ( $\epsilon^2 = 0.13$ ), and large ( $\epsilon^2 = 0.26$ ) effect sizes, respectively.

## References

- Alfaro-Almagro, F., Jenkinson, M., Bangerter, N. K., Andersson, J. L., Griffanti, L., Douaud, G., Sotiropoulos, S. N., Jbabdi, S., Hernandez-Fernandez, M., Vallee, E., et al., 2018. Image processing and quality control for the first 10,000 brain imaging datasets from uk biobank. *Neuroimage* 166, 400–424.
- Caprihan, A., Abbott, C., Yamamoto, J., Pearlson, G., Perrone-Bizzozero, N., Sui, J., Calhoun, V. D., 2011. Source-Based Morphometry Analysis of Group Differences in Fractional Anisotropy in Schizophrenia. *Brain Connect* 1 (2), 133–145.
- Cetin-Karayumak, S., Di Biase, M. A., Chunga, N., Reid, B., Somes, N., Lyall, A. E., Kelly, S., Solgun, B., Pasternak, O., Vangel, M., Pearlson, G., Tamminga, C., Sweeney, J. A., Clementz, B., Schretlen, D., Viher, P. V., Stegmayer, K., Walther, S., Lee, J., Crow, T., James, A., Voineskos, A., Buchanan, R. W., Szeszko, P. R., Malhotra, A. K., Hegde, R., McCarley, R., Keshavan, M., Shenton, M., Rathi, Y., Kubicki, M., 2020. White matter abnormalities across the lifespan of schizophrenia: a harmonized multi-site diffusion MRI study. *Mol Psychiatry* 25 (12), 3208–3219.
- Giakoumatos, C., Nanda, P., Mathew, I., Tandon, N., Shah, J., Bishop, J., Clementz, B., Pearlson, G., Sweeney, J., Tamminga, C., Keshavan, M., 2015. Effects of lithium on cortical thickness and hippocampal subfield volumes in psychotic bipolar disorder. *Journal of Psychiatric Research* 61, 180–187.
- Griffanti, L., Salimi-Khorshidi, G., Beckmann, C. F., Auerbach, E. J., Douaud, G., Sexton, C. E., Zsoldos, E., Ebmeier, K. P., Filippini, N., Mackay, C. E., et al., 2014. Ica-based artefact removal and accelerated fmri acquisition for improved resting state network imaging. *Neuroimage* 95, 232–247.
- Herskovits, E. H., Hong, L. E., Kochunov, P., Sampath, H., Chen, R., 2015. Edge-Centered DTI Connectivity Analysis: Application to Schizophrenia. *Neuroinform* 13 (4), 501–509.
- INDI, 2022. Retrospective Data Sharing Samples.  
URL [http://fcon\\_1000.projects.nitrc.org/indi/retro/cobre.html](http://fcon_1000.projects.nitrc.org/indi/retro/cobre.html)
- Qi, S., Calhoun, V. D., van Erp, T. G. M., Bustillo, J., Damaraju, E., Turner, J. A., Du, Y., Yang, J., Chen, J., Yu, Q., Mathalon, D. H., Ford, J. M., Voyvodic, J., Mueller, B. A., Belger, A., McEwen, S., Potkin, S. G., Preda, A., Jiang, T., Sui, J., 2018. Multimodal Fusion With Reference: Searching for Joint Neuromarkers of Working Memory Deficits in Schizophrenia. *IEEE Trans. Med. Imaging* 37 (1), 93–105.

Qi, S., Sui, J., Pearlson, G., Bustillo, J., Perrone-Bizzozero, N. I., Kochunov, P., Turner, J. A., Fu, Z., Shao, W., Jiang, R., Yang, X., Liu, J., Du, Y., Chen, J., Zhang, D., Calhoun, V. D., 2022. Derivation and utility of schizophrenia polygenic risk associated multimodal MRI frontotemporal network. *Nat Commun* 13 (1), 4929.

Schijven, D., Postema, M. C., Fukunaga, M., Matsumoto, J., Miura, K., de Zwarte, S. M. C., van Haren, N. E. M., Cahn, W., Hulshoff Pol, H. E., Kahn, R. S., Ayasa-Arriola, R., Ortiz-García de la Foz, V., Tordesillas-Gutierrez, D., Vázquez-Bourgon, J., Crespo-Facorro, B., Alnæs, D., Dahl, A., Westlye, L. T., Agartz, I., Andreassen, O. A., Jönsson, E. G., Kochunov, P., Bruggemann, J. M., Catts, S. V., Michie, P. T., Mowry, B. J., Quidé, Y., Rasser, P. E., Schall, U., Scott, R. J., Carr, V. J., Green, M. J., Henskens, F. A., Loughland, C. M., Pantelis, C., Weickert, C. S., Weickert, T. W., de Haan, L., Brosch, K., Pfarr, J.-K., Ringwald, K. G., Stein, F., Jansen, A., Kircher, T. T. J., Nenadić, I., Krämer, B., Gruber, O., Satterthwaite, T. D., Bustillo, J., Mathalon, D. H., Preda, A., Calhoun, V. D., Ford, J. M., Potkin, S. G., Chen, J., Tan, Y., Wang, Z., Xiang, H., Fan, F., Bernardoni, F., Ehrlich, S., Fuentes-Claramonte, P., Garcia-Leon, M. A., Guerrero-Pedraza, A., Salvador, R., Sarró, S., Pomarol-Clotet, E., Ciullo, V., Piras, F., Vecchio, D., Banaj, N., Spalletta, G., Michielse, S., van Amelsvoort, T., Dickie, E. W., Voineskos, A. N., Sim, K., Ciufolini, S., Dazzan, P., Murray, R. M., Kim, W.-S., Chung, Y.-C., Andreou, C., Schmidt, A., Borgwardt, S., McIntosh, A. M., Whalley, H. C., Lawrie, S. M., du Plessis, S., Luckhoff, H. K., Scheffler, F., Emsley, R., Grotegerd, D., Lencer, R., Dannlowski, U., Edmond, J. T., Rootes-Murdy, K., Stephen, J. M., Mayer, A. R., Antonucci, L. A., Fazio, L., Pergola, G., Bertolino, A., Díaz-Caneja, C. M., Janssen, J., Lois, N. G., Arango, C., Tomyshev, A. S., Lebedeva, I., Cervenka, S., Sellgren, C. M., Georgiadis, F., Kirschner, M., Kaiser, S., Hajek, T., Skoch, A., Spaniel, F., Kim, M., Kwak, Y. B., Oh, S., Kwon, J. S., James, A., Bakker, G., Knöchel, C., Stäblein, M., Oertel, V., Uhlmann, A., Howells, F. M., Stein, D. J., Temmingh, H. S., Diaz-Zuluaga, A. M., Pineda-Zapata, J. A., López-Jaramillo, C., Homan, S., Ji, E., Surbeck, W., Homan, P., Fisher, S. E., Franke, B., Glahn, D. C., Gur, R. C., Hashimoto, R., Jahanshad, N., Luders, E., Medland, S. E., Thompson, P. M., Turner, J. A., van Erp, T. G. M., Francks, C., 2023. Large-scale analysis of structural brain asymmetries in schizophrenia via the ENIGMA consortium. *Proceedings of the National Academy of Sciences* 120 (14), e2213880120.

Wang, Q., Chen, R., JaJa, J., Jin, Y., Hong, L. E., Herskovits, E. H., 2016. Connectivity-Based Brain Parcellation: A Connectivity-Based Atlas for Schizophrenia Research. *Neuroinform* 14 (1), 83–97.

- Wright, S. N., Hong, L. E., Winkler, A. M., Chiappelli, J., Nugent, K., Muellerklein, F., Du, X., Rowland, L. M., Wang, D. J. J., Kochunov, P., 2015. Perfusion shift from white to gray matter may account for processing speed deficits in schizophrenia: Perfusion Shift from White to Gray Matter. *Hum. Brain Mapp.* 36 (10), 3793–3804.
- Wu, L., Calhoun, V. D., Jung, R. E., Caprihan, A., 2015. Connectivity-based whole brain dual parcellation by group ICA reveals tract structures and decreased connectivity in schizophrenia. *Hum Brain Mapp* 36 (11), 4681–4701.
- Zhao, N., Yuan, L.-X., Jia, X.-Z., Zhou, X.-F., Deng, X.-P., He, H.-J., Zhong, J., Wang, J., Zang, Y.-F., 2018. Intra-and inter-scanner reliability of voxel-wise whole-brain analytic metrics for resting state fmri. *Frontiers in neuroinformatics* 12, 54.
